# Supplementary material for: Ichthyoplankton assemblage structure of springs in the Yangtze Estuary revealed by biological and environmental visions
Source: PeerJ. 2015 Aug 18;3:e1186. doi: 10.7717/peerj.1186 (PMC4548499; doi:10.7717/peerj.1186)
Supplement: Supplemental Information 1 [file peerj-03-1186-s001.xls]

## Sheet: 1999
	(m)		(oC)	(mg/L)		(mg/L)	(μmol/L)	(μmol/L)	(mg/L)			泥沙4月	泥沙12-04	泥沙5月	径流04月	径流12-04	径流05月	浮游植物	浊度
	Depth	S	T	DO	PH	COD	TN	TP	TSM	Chla	Trans	sediment04	sediment12-04	sediment05	runoff10	runoff06-10	runoff11	phyto	tur
A02	32	16.651	19.93	11.24	8.61	2.57	56.5	0.52	1.8	5.321	2.99998	0.12	0.317	0.19	20300	60500	34000	17080300	3.87596
A05	20	27.563	17.38	8.24	8.16	0.89	35.8	0.75	2.4	0.476	3.49997	0.12	0.317	0.19	20300	60500	34000	0	4.79483
A06	30	16.682	20.32	10.17	8.45	1.23	56.2	0.79	3.9	0.827	1.99999	0.12	0.317	0.19	20300	60500	34000	40100	6.86904
A07	34	17.23	15.89	13.95	8.85	3.22	58.3	0.61	4.1	2.926	3.99997	0.12	0.317	0.19	20300	60500	34000	55700	7.1284
A09	10	23.939	14.98	8.04	8.18	1.1	43.4	0.87	11.8	0.914	0.699998	0.12	0.317	0.19	20300	60500	34000	1917200	15.6261
A10	16	12.82	19.09	8.39	8.28	3.27	77.3	1.5	30.4	1.009	0.399998	0.12	0.317	0.19	20300	60500	34000	0	31.6258
A11	27	20.223	19.76	8.15	8.29	1.26	64.5	1.06	6.7	2.186	0.999993	0.12	0.317	0.19	20300	60500	34000	62000	10.2612
A12	28	19.384	19.48	10.66	8.46	1.68	68.8	0.94	7.1	4.257	1.49999	0.12	0.317	0.19	20300	60500	34000	84940	10.7127
A13	32	15.656	20.48	10.57	8.67	2.33	70.1	0.7	1.7	5.853	2.99998	0.12	0.317	0.19	20300	60500	34000	569100	3.71563
A15	7	17.847	18.89	8.7	8.22	1.02	84	1.3	17	1.409	0.499996	0.12	0.317	0.19	20300	60500	34000	949000	20.5052
A16	8	17.256	18.79	8.57	8.2	1.38	65.2	1.6	11.1	3.235	0.999993	0.12	0.317	0.19	20300	60500	34000	107400	14.9313
A17	18	15.462	19.51	9.13	8.3	1.26	76.5	1	8.6	4.345	1.49999	0.12	0.317	0.19	20300	60500	34000	0	12.3516
A18	42	19.105	20.59	10.22	8.52	1.59	65.5	1.3	3	1.523	5.2975	0.12	0.317	0.19	20300	60500	34000	406910	5.65585
A19	42	19.329	20.33	10	8.48	1.5	65	1	1.3	0.966	5.99996	0.12	0.317	0.19	20300	60500	34000	2986300	3.04766
A21	8	3.303	19.8	8.12	7.82	3.11	138.5	2	36.6	1.018	0.199998	0.12	0.317	0.19	20300	60500	34000	503800	36.3258
A22	8	7.799	19.37	8.26	8.02	4.54	115.7	1.7	50.8	0.77	0.199995	0.12	0.317	0.19	20300	60500	34000	10000	46.4087
A23	10	16.624	18.37	7.75	8.22	1.17	81.3	1.5	23.9	0.197	0.500009	0.12	0.317	0.19	20300	60500	34000	22000	26.4308
A24	12	17.509	19.34	9.54	8.43	1.05	70.2	0.79	5.7	5.764	1.49999	0.12	0.317	0.19	20300	60500	34000	0	9.10125
A25	32	22.308	18.46	10.23	8.47	0.77	45.3	0.55	3	0.722	4.49997	0.12	0.317	0.19	20300	60500	34000	631200	5.65585
A26	48	22.74	19.03	10.81	8.47	0.9	45.7	0.67	1.9	0.479	5.99996	0.12	0.317	0.19	20300	60500	34000	839000	4.03402
A28	9	17.606	18.78	8.18	8.17	3.17	61.6	1.1	95.2	0.206	0.300001	0.12	0.317	0.19	20300	60500	34000	920000	74.2608
A29	10	21.773	18.67	8.11	8.15	2.17	96.1	4.5	21	0.966	0.799995	0.12	0.317	0.19	20300	60500	34000	1672000	24.0012
A30	9	23.643	18.77	8.08	8.17	2.7	69.4	6.5	11.2	0.717	1.19999	0.12	0.317	0.19	20300	60500	34000	2000	15.0313
A31	23	27.498	18.26	8.07	8.11	1.94	48.8	1.9	8.9	3.961	0.499997	0.12	0.317	0.19	20300	60500	34000	11200	12.6703
A32	33	27.209	19.28	8.91	8.2	2.17	73.8	1.4	3.5	1.387	1.99999	0.12	0.317	0.19	20300	60500	34000	0	6.33982
A33	42	26.836	19	10.2	8.41	2.47	51.9	0.58	4.2	0.544	6.29996	0.12	0.317	0.19	20300	60500	34000	206090	7.25686
A35	5	2.859	20.15	7.52	7.9	3.17	130	2.4	48.6	0.531	0.199999	0.12	0.317	0.19	20300	60500	34000	27000	44.8979
A36	7	2.858	20.4	8.01	8.16	3.31	128.6	2.4	88.6	0.639	0.200001	0.12	0.317	0.19	20300	60500	34000	17000	70.369
A37	10	2.858	20.58	8.38	8.33	2.97	128.4	2	39.8	0.339	0.199998	0.12	0.317	0.19	20300	60500	34000	12200	38.6724
A38	9	2.858	20.86	8.23	8.17	3.17	125.9	2.2	73.2	0.374	0.200003	0.12	0.317	0.19	20300	60500	34000	8510	60.9936
A39	8	2.858	20.74	7.34	8.23	3.47	151.3	3.2	79	0.757	0.200001	0.12	0.317	0.19	20300	60500	34000	1700	64.577
A40	9	4.127	19.9	8.56	8.09	3.31	106.2	1.9	41	1.032	0.299997	0.12	0.317	0.19	20300	60500	34000	0	39.5401
A02	1.51851	1.24677	1.32077	1.08778	0.982723	0.552668	1.75967	0.181844	0.447158	0.800786	0.602058	0.049218	0.119586	0.075547	4.30752	4.78176	4.53149	7.2325	0.68806
A05	1.32222	1.4558	1.26435	0.965672	0.961895	0.276462	1.56585	0.243038	0.531479	0.169086	0.65321	0.049218	0.119586	0.075547	4.30752	4.78176	4.53149	0	0.763041
A06	1.49136	1.24753	1.32879	1.04805	0.975432	0.348305	1.7574	0.252853	0.690196	0.261739	0.477119	0.049218	0.119586	0.075547	4.30752	4.78176	4.53149	4.60316	0.895922
A07	1.54407	1.26079	1.22763	1.17464	0.993436	0.625312	1.77305	0.206826	0.70757	0.59395	0.698968	0.049218	0.119586	0.075547	4.30752	4.78176	4.53149	4.74586	0.910005
A09	1.04139	1.39688	1.20358	0.956168	0.962843	0.322219	1.64738	0.271842	1.10721	0.281942	0.230448	0.049218	0.119586	0.075547	4.30752	4.78176	4.53149	6.28267	1.22079
A10	1.23045	1.14051	1.30298	0.972666	0.967548	0.630428	1.89376	0.39794	1.49693	0.30298	0.146127	0.049218	0.119586	0.075547	4.30752	4.78176	4.53149	0	1.51356
A11	1.44716	1.32681	1.31723	0.961421	0.968016	0.354108	1.81624	0.313867	0.886491	0.503246	0.301028	0.049218	0.119586	0.075547	4.30752	4.78176	4.53149	4.7924	1.05159
A12	1.4624	1.30929	1.31133	1.0667	0.975891	0.428135	1.84386	0.287802	0.908485	0.720738	0.397938	0.049218	0.119586	0.075547	4.30752	4.78176	4.53149	4.92912	1.06866
A13	1.51851	1.22157	1.33203	1.06333	0.985426	0.522444	1.85187	0.230449	0.431364	0.835881	0.602058	0.049218	0.119586	0.075547	4.30752	4.78176	4.53149	5.75519	0.67354
A15	0.90309	1.27524	1.29863	0.986772	0.964731	0.305351	1.92942	0.361728	1.25527	0.381837	0.17609	0.049218	0.119586	0.075547	4.30752	4.78176	4.53149	5.97727	1.33254
A16	0.954243	1.26141	1.29645	0.980912	0.963788	0.376577	1.82086	0.414973	1.08279	0.626853	0.301029	0.049218	0.119586	0.075547	4.30752	4.78176	4.53149	5.03101	1.20225
A17	1.27875	1.21648	1.31197	1.00561	0.968483	0.354108	1.8893	0.30103	0.982271	0.727948	0.397938	0.049218	0.119586	0.075547	4.30752	4.78176	4.53149	0	1.12553
A18	1.63347	1.3033	1.33425	1.04999	0.978637	0.4133	1.82282	0.361728	0.60206	0.401917	0.799168	0.049218	0.119586	0.075547	4.30752	4.78176	4.53149	5.6095	0.823204
A19	1.63347	1.30812	1.32899	1.04139	0.976808	0.39794	1.81954	0.30103	0.361728	0.293584	0.845096	0.049218	0.119586	0.075547	4.30752	4.78176	4.53149	6.47513	0.607204
A21	0.954243	0.633771	1.31806	0.959995	0.945469	0.613842	2.14457	0.477121	1.57519	0.304921	0.0791806	0.049218	0.119586	0.075547	4.30752	4.78176	4.53149	5.70226	1.57201
A22	0.954243	0.944433	1.30899	0.966611	0.955207	0.74351	2.06707	0.431364	1.71433	0.247973	0.0791794	0.049218	0.119586	0.075547	4.30752	4.78176	4.53149	4.00004	1.67586
A23	1.04139	1.2461	1.28713	0.942008	0.964731	0.33646	1.9154	0.39794	1.3962	0.0780942	0.176094	0.049218	0.119586	0.075547	4.30752	4.78176	4.53149	4.34244	1.43824
A24	1.11394	1.26738	1.30835	1.02284	0.974512	0.311754	1.85248	0.252853	0.826075	0.830204	0.397938	0.049218	0.119586	0.075547	4.30752	4.78176	4.53149	0	1.00437
A25	1.51851	1.36751	1.28914	1.05038	0.97635	0.247973	1.66558	0.190332	0.60206	0.236033	0.740361	0.049218	0.119586	0.075547	4.30752	4.78176	4.53149	5.80017	0.823204
A26	1.6902	1.37548	1.30168	1.07225	0.97635	0.278754	1.66932	0.222716	0.462398	0.169968	0.845095	0.049218	0.119586	0.075547	4.30752	4.78176	4.53149	5.92376	0.701915
A28	1	1.26965	1.29623	0.962843	0.962369	0.620136	1.79657	0.322219	1.98318	0.0813473	0.113944	0.049218	0.119586	0.075547	4.30752	4.78176	4.53149	5.96379	1.87657
A29	1.04139	1.35742	1.2938	0.959518	0.961421	0.501059	1.98722	0.740363	1.34242	0.293584	0.255271	0.049218	0.119586	0.075547	4.30752	4.78176	4.53149	6.22324	1.39796
A30	1	1.39169	1.29601	0.958086	0.962369	0.568202	1.84757	0.875061	1.08636	0.23477	0.342422	0.049218	0.119586	0.075547	4.30752	4.78176	4.53149	3.30125	1.20497
A31	1.38021	1.45481	1.28466	0.957607	0.959518	0.468347	1.69723	0.462398	0.995635	0.695569	0.17609	0.049218	0.119586	0.075547	4.30752	4.78176	4.53149	4.04926	1.13578
A32	1.53148	1.45039	1.30707	0.996074	0.963788	0.501059	1.8739	0.380211	0.653213	0.377852	0.477119	0.049218	0.119586	0.075547	4.30752	4.78176	4.53149	0	0.865686
A33	1.63347	1.44461	1.30103	1.04922	0.97359	0.540329	1.72346	0.198657	0.716003	0.188647	0.863321	0.049218	0.119586	0.075547	4.30752	4.78176	4.53149	5.31406	0.916815
A35	0.778151	0.586475	1.32531	0.93044	0.94939	0.620136	2.11727	0.531479	1.69548	0.184975	0.0791809	0.049218	0.119586	0.075547	4.30752	4.78176	4.53149	4.43138	1.66179
A36	0.90309	0.586362	1.33041	0.954725	0.961895	0.634477	2.11261	0.531479	1.95231	0.214579	0.0791815	0.049218	0.119586	0.075547	4.30752	4.78176	4.53149	4.23047	1.85351
A37	1.04139	0.586362	1.33405	0.972203	0.969882	0.598791	2.11193	0.477121	1.61066	0.126781	0.0791803	0.049218	0.119586	0.075547	4.30752	4.78176	4.53149	4.0864	1.59849
A38	1	0.586362	1.33965	0.965202	0.962369	0.620136	2.10346	0.50515	1.8704	0.137987	0.0791822	0.049218	0.119586	0.075547	4.30752	4.78176	4.53149	3.92998	1.79235
A39	0.954243	0.586362	1.33726	0.921166	0.965202	0.650308	2.1827	0.623249	1.90309	0.244772	0.0791817	0.049218	0.119586	0.075547	4.30752	4.78176	4.53149	3.2307	1.81675
A40	1	0.709863	1.32015	0.980458	0.958564	0.634477	2.03019	0.462398	1.62325	0.307924	0.113942	0.049218	0.119586	0.075547	4.30752	4.78176	4.53149	0	1.60789

## Sheet: 2001
	(m)		(oC)	(mg/L)		(mg/L)	(μmol/L)	(μmol/L)	(mg/L)			泥沙4月	泥沙12-04	泥沙5月	径流04月	径流12-04	径流05月	浮游植物
	Depth	S	T	DO	PH	COD	TN	TP	TSM	Chla	Trans	sediment04	sediment12-04	sediment05	runoff10	runoff06-10	runoff11	phyto	tur
B01	24	29.18	17.3	5.64	8.11	0.64	42.6	0.6	6.3	0.628	1.00005	0.128	0.493	0.157	23100	89700	34100	83800	9.80293
B02	30	27.29	17.96	7.34	8.14	0.92	35.6	0.4	3.7	4.392	5.1	0.128	0.493	0.157	23100	89700	34100	35800	6.60626
B03	41	30.45	16.65	6.15	8.17	1.08	41.3	0.9	2.8	0.551	5.09996	0.128	0.493	0.157	23100	89700	34100	29200	5.37423
B05	30	25.9	18.42	6.68	8.14	1.08	37.7	1.1	2.5	1.536	0.899986	0.128	0.493	0.157	23100	89700	34100	0	4.94186
B06	34	27.47	18.13	7.23	8.23	0.88	32.9	0.67	1.3	1.177	2.70002	0.128	0.493	0.157	23100	89700	34100	18800	3.04766
B07	40	28.1	17.79	7.64	8.16	1.08	37.8	0.64	3.1	0.186	5.09992	0.128	0.493	0.157	23100	89700	34100	15100	5.79485
B09	8	5.49	18.3	5.52	8.26	2.04	51.6	1.2	68	3.63	0.299998	0.128	0.493	0.157	23100	89700	34100	26800	57.7205
B10	14	6.62	18.96	5.68	8.22	1.72	77.7	1.4	14.6	2.819	0.799991	0.128	0.493	0.157	23100	89700	34100	0	18.3086
B11	28	12.68	18.56	6.7	8.2	1.92	55.8	1.2	14.2	7.406	1.2	0.128	0.493	0.157	23100	89700	34100	1221200	17.9339
B12	30	18.34	18.64	8.73	8.17	4.32	24.4	0.63	10.6	3.492	1.7	0.128	0.493	0.157	23100	89700	34100	2144400	14.4283
B13	32	31.33	16.95	6.73	8.11	1.12	30.1	0.44	2.4	1.721	3.49999	0.128	0.493	0.157	23100	89700	34100	992400	4.79483
B15	8	14.74	18.23	5.5	8.25	1.92	43.3	1.3	61.8	2.37	0.199989	0.128	0.493	0.157	23100	89700	34100	1586900	53.7356
B16	16	19.06	21.17	6.19	8.24	2.4	77.9	1.4	14.4	2.887	1	0.128	0.493	0.157	23100	89700	34100	58200	18.1216
B17	22	21.22	18.19	6.94	8.1	1.96	12	0.81	8.8	2.834	1.2	0.128	0.493	0.157	23100	89700	34100	0	12.5644
B18	42	29.21	19.04	7.06	8.13	0.84	19.6	0.3	2.9	1.095	8.49998	0.128	0.493	0.157	23100	89700	34100	2291600	5.51566
B19	46	29.38	17.47	7.12	8.09	1	23.7	0.46	2.8	0.55	8.50001	0.128	0.493	0.157	23100	89700	34100	2348600	5.37423
B21	5	9.33	18.4	5.31	8.14	3.4	110.6	3.6	433.5	1.803	0.200004	0.128	0.493	0.157	23100	89700	34100	423000	231.985
B22	8	11.99	18.2	5.14	8.11	3.72	103.4	4.8	836	1.3	0.299997	0.128	0.493	0.157	23100	89700	34100	69700	380.762
B23	8	13.02	19.35	5.6	8.25	1.52	90.2	1.2	40.2	2.606	0.494313	0.128	0.493	0.157	23100	89700	34100	11500	38.9624
B24	14	16.29	17.5	5.66	8.19	1.2	58.6	1.1	21.6	1.061	0.971224	0.128	0.493	0.157	23100	89700	34100	0	24.5105
B25	16	20.41	17.18	5.62	8.14	1.4	50.4	1.2	5.9	3.748	0.694137	0.128	0.493	0.157	23100	89700	34100	0	9.33714
B26	50	29.68	16.37	6.2	8.12	1.24	32.1	0.82	3.9	3.477	3.05528	0.128	0.493	0.157	23100	89700	34100	0	6.86904
B28	8	18.03	17.67	5.56	8.09	3.52	59.6	2	792.5	0.68	0.200043	0.128	0.493	0.157	23100	89700	34100	8952900	365.699
B29	9	18.81	17.83	5.7	8.11	3.76	66.4	4.4	814	1.055	0.199994	0.128	0.493	0.157	23100	89700	34100	1023500	373.168
B30	12	18.38	17.55	5.46	8.21	2	49.8	1.2	26.9	1.281	0.499978	0.128	0.493	0.157	23100	89700	34100	586000	28.8675
B31	18	26.14	17.68	5.29	8.14	1	34.8	0.77	11.2	0.754	0.900028	0.128	0.493	0.157	23100	89700	34100	42300	15.0313
B32	38	27.8	17.48	5.68	8.08	1	29.7	0.78	8	2.463	1.80001	0.128	0.493	0.157	23100	89700	34100	0	11.7055
B33	46	31.58	17.73	6.22	8.09	1.4	13.7	0.3	3	2.088	5.50383	0.128	0.493	0.157	23100	89700	34100	0	5.65585
B35	10	3	18.87	5.24	8.32	3	93.6	6	116.6	0.512	0.300023	0.128	0.493	0.157	23100	89700	34100	0	86.451
B36	32	3	18.78	5.34	8.29	3.4	90.7	3.9	109.4	1.025	0.200027	0.128	0.493	0.157	23100	89700	34100	0	82.4167
B37	10	3	18.7	5.58	7.95	2.2	88.6	1.9	142.4	0.512	0.300023	0.128	0.493	0.157	23100	89700	34100	0	100.437
B38	8	3	18.9	5.84	8.36	2.4	107	2.9	117.2	0.698	0.552277	0.128	0.493	0.157	23100	89700	34100	0	86.7844
B39	8	18.03	18.9	5.29	8.15	2.92	100.9	2.9	398	2.161	0.299991	0.128	0.493	0.157	23100	89700	34100	147900	217.522
B40	6	5.64	18.68	5.36	8.16	3.52	130.6	7	1685	0.598	0.199981	0.128	0.493	0.157	23100	89700	34100	0	647.009
B01	1.39794	1.47972	1.26245	0.822168	0.959518	0.214844	1.63949	0.20412	0.863323	0.211654	0.301041	0.0523091	0.17406	0.0633334	4.36363	4.9528	4.53277	4.92325	1.03354
B02	1.49136	1.45163	1.27784	0.921166	0.960946	0.283301	1.56348	0.146128	0.672098	0.73175	0.78533	0.0523091	0.17406	0.0633334	4.36363	4.9528	4.53277	4.5539	0.881171
B03	1.62325	1.49762	1.24674	0.854306	0.962369	0.318063	1.62634	0.278754	0.579784	0.190612	0.785327	0.0523091	0.17406	0.0633334	4.36363	4.9528	4.53277	4.4654	0.804428
B05	1.49136	1.42975	1.28825	0.885361	0.960946	0.318063	1.58771	0.322219	0.544068	0.404149	0.27875	0.0523091	0.17406	0.0633334	4.36363	4.9528	4.53277	0	0.773923
B06	1.54407	1.45439	1.28171	0.9154	0.965202	0.274158	1.5302	0.222716	0.361728	0.337858	0.568204	0.0523091	0.17406	0.0633334	4.36363	4.9528	4.53277	4.27418	0.607204
B07	1.61278	1.46389	1.27393	0.936514	0.961895	0.318063	1.58883	0.214844	0.612784	0.0740847	0.785324	0.0523091	0.17406	0.0633334	4.36363	4.9528	4.53277	4.17901	0.83218
B09	0.954243	0.812245	1.28556	0.814248	0.966611	0.482874	1.72099	0.342423	1.83885	0.665581	0.113943	0.0523091	0.17406	0.0633334	4.36363	4.9528	4.53277	4.42815	1.76879
B10	1.17609	0.881955	1.30016	0.824776	0.964731	0.434569	1.89597	0.380211	1.19312	0.58195	0.25527	0.0523091	0.17406	0.0633334	4.36363	4.9528	4.53277	0	1.28575
B11	1.4624	1.13609	1.29137	0.886491	0.963788	0.465383	1.75435	0.342423	1.18184	0.924589	0.342423	0.0523091	0.17406	0.0633334	4.36363	4.9528	4.53277	6.08679	1.27724
B12	1.49136	1.28646	1.29314	0.988113	0.962369	0.725912	1.40483	0.212188	1.06446	0.65244	0.431364	0.0523091	0.17406	0.0633334	4.36363	4.9528	4.53277	6.33131	1.18832
B13	1.51851	1.50961	1.25406	0.888179	0.959518	0.326336	1.49276	0.158362	0.531479	0.434729	0.653212	0.0523091	0.17406	0.0633334	4.36363	4.9528	4.53277	5.99669	0.763041
B15	0.954243	1.197	1.28398	0.812913	0.966142	0.465383	1.6464	0.361728	1.79796	0.52763	0.0791774	0.0523091	0.17406	0.0633334	4.36363	4.9528	4.53277	6.20055	1.73827
B16	1.23045	1.30233	1.34577	0.856729	0.965672	0.531479	1.89708	0.380211	1.18752	0.589615	0.301031	0.0523091	0.17406	0.0633334	4.36363	4.9528	4.53277	4.76493	1.28152
B17	1.36173	1.34674	1.28307	0.899821	0.959041	0.471292	1.11394	0.257679	0.991226	0.583652	0.342422	0.0523091	0.17406	0.0633334	4.36363	4.9528	4.53277	0	1.1324
B18	1.63347	1.48015	1.3019	0.906335	0.960471	0.264818	1.31387	0.113943	0.591065	0.321184	0.977723	0.0523091	0.17406	0.0633334	4.36363	4.9528	4.53277	6.36014	0.813959
B19	1.6721	1.48259	1.26647	0.909556	0.958564	0.30103	1.3927	0.164353	0.579784	0.190332	0.977724	0.0523091	0.17406	0.0633334	4.36363	4.9528	4.53277	6.37081	0.804428
B21	0.778151	1.0141	1.2878	0.800029	0.960946	0.643453	2.04766	0.662758	2.63799	0.447623	0.0791826	0.0523091	0.17406	0.0633334	4.36363	4.9528	4.53277	5.62634	2.36733
B22	0.954243	1.11361	1.2833	0.788168	0.959518	0.673942	2.0187	0.763428	2.92273	0.361728	0.113942	0.0523091	0.17406	0.0633334	4.36363	4.9528	4.53277	4.84324	2.58179
B23	0.954243	1.14675	1.30856	0.819544	0.966142	0.401401	1.95999	0.342423	1.6149	0.557026	0.174442	0.0523091	0.17406	0.0633334	4.36363	4.9528	4.53277	4.06074	1.60165
B24	1.17609	1.23779	1.26717	0.823474	0.963316	0.342423	1.77525	0.322219	1.35411	0.314078	0.294736	0.0523091	0.17406	0.0633334	4.36363	4.9528	4.53277	0	1.40672
B25	1.23045	1.33062	1.25959	0.820858	0.960946	0.380211	1.71096	0.342423	0.838849	0.676511	0.228948	0.0523091	0.17406	0.0633334	4.36363	4.9528	4.53277	0	1.0144
B26	1.70757	1.48686	1.2398	0.857332	0.959995	0.350248	1.51983	0.260071	0.690196	0.650987	0.608021	0.0523091	0.17406	0.0633334	4.36363	4.9528	4.53277	0	0.895922
B28	0.954243	1.27944	1.27114	0.816904	0.958564	0.655138	1.78247	0.477121	2.89955	0.225309	0.0791967	0.0523091	0.17406	0.0633334	4.36363	4.9528	4.53277	6.95196	2.56431
B29	1	1.29688	1.27485	0.826075	0.959518	0.677607	1.82866	0.732394	2.91116	0.312812	0.0791792	0.0523091	0.17406	0.0633334	4.36363	4.9528	4.53277	6.01009	2.57307
B30	1.11394	1.28735	1.26834	0.810233	0.96426	0.477121	1.70586	0.342423	1.4456	0.358125	0.176085	0.0523091	0.17406	0.0633334	4.36363	4.9528	4.53277	5.7679	1.4752
B31	1.27875	1.43361	1.27138	0.798651	0.960946	0.30103	1.55388	0.247973	1.08636	0.24403	0.27876	0.0523091	0.17406	0.0633334	4.36363	4.9528	4.53277	4.62635	1.20497
B32	1.59106	1.45939	1.2667	0.824776	0.958086	0.30103	1.48714	0.25042	0.954243	0.539452	0.447159	0.0523091	0.17406	0.0633334	4.36363	4.9528	4.53277	0	1.10399
B33	1.6721	1.51295	1.27254	0.858537	0.958564	0.380211	1.16732	0.113943	0.60206	0.489677	0.813169	0.0523091	0.17406	0.0633334	4.36363	4.9528	4.53277	0	0.823204
B35	1.04139	0.60206	1.2982	0.795185	0.969416	0.60206	1.97589	0.845098	2.07041	0.179552	0.113951	0.0523091	0.17406	0.0633334	4.36363	4.9528	4.53277	0	1.94176
B36	1.51851	0.60206	1.29623	0.802089	0.968016	0.643453	1.96237	0.690196	2.04297	0.306425	0.0791909	0.0523091	0.17406	0.0633334	4.36363	4.9528	4.53277	0	1.92125
B37	1.04139	0.60206	1.29447	0.818226	0.951823	0.50515	1.95231	0.462398	2.15655	0.179552	0.113951	0.0523091	0.17406	0.0633334	4.36363	4.9528	4.53277	0	2.00619
B38	0.954243	0.60206	1.29885	0.835056	0.971276	0.531479	2.03342	0.591065	2.07262	0.229938	0.190969	0.0523091	0.17406	0.0633334	4.36363	4.9528	4.53277	0	1.94342
B39	0.954243	1.27944	1.29885	0.798651	0.961421	0.593286	2.00817	0.591065	2.60097	0.499824	0.11394	0.0523091	0.17406	0.0633334	4.36363	4.9528	4.53277	5.16997	2.33949
B40	0.845098	0.822168	1.29403	0.803457	0.961895	0.655138	2.11926	0.90309	3.22686	0.203577	0.0791744	0.0523091	0.17406	0.0633334	4.36363	4.9528	4.53277	0	2.81158

## Sheet: 2004
	(m)		(oC)	(mg/L)		(mg/L)	(μmol/L)	(μmol/L)	(mg/L)		透明度	泥沙4月	泥沙12-04	泥沙5月	径流04月	径流12-04	径流05月	浮游植物
	Depth	S	T	DO	PH	COD	TN	TP	TSM	ChlC	TrCns	sediment04	sediment12-04	sediment05	runoff10	runoff06-10	runoff11	phyto	tur
C2	32	20.35	21.14	7.12	8.43	0.458741	67.3	0.74	6.7	17.6229	3	0.119	0.484	0.174	17800	62770	29800	267647	10.2612
C3	34	22.62	21.64	7.11	8.47	0.601474	67.6	0.99	5.2	4.05652	4	0.119	0.484	0.174	17800	62770	29800	4110.5	8.50203
C5	24	26.4	19.93	4.73	8.07	0.94359	65.4	0.78	3.7	6.80134	3	0.119	0.484	0.174	17800	62770	29800	185108	6.60626
C8	40	25.36	21.71	5.78	8.48	1.23047	36.6	0.87	3.1	1.71373	4.8	0.119	0.484	0.174	17800	62770	29800	1589.2	5.79485
C9	10	25.45	19.42	4.9	8.12	3.07	60.5	1.2	64.7	11.6594	0.6	0.119	0.484	0.174	17800	62770	29800	320000	55.6113
C10	12	25.11	20.21	7.97	8.41	2.58462	52.4	0.85	11.2	3.58285	1.1	0.119	0.484	0.174	17800	62770	29800	1109888	15.0313
C11	24	27.54	19.47	6.16	8.14	1.35385	39	0.87	9.9	19.5153	2.4	0.119	0.484	0.174	17800	62770	29800	11462.3	13.7138
C12	24	27.75	20.42	6.7	8.25	1.13007	41	0.96	3.8	0.370793	4.9	0.119	0.484	0.174	17800	62770	29800	1420	6.7381
C13	32	29.43	20.49	4.07	8.35	0.496037	48	1	2.3	1.02971	6.6	0.119	0.484	0.174	17800	62770	29800	2515.9	4.64621
C14	30	29.07	20.97	5.4	8.36	0.994595	26.3	0.63	3.4	2.85009	4.3	0.119	0.484	0.174	17800	62770	29800	0	6.20515
C20	45	30.69	21.44	4.99	8.39	1.29265	32	0.86	4.5	1.22584	4.4	0.119	0.484	0.174	17800	62770	29800	195	7.63766
C21	6	14.2	20.47	6.79	7.99	4.22211	88.1	1.8	291.3	0.227035	0.5	0.119	0.484	0.174	17800	62770	29800	137	171.972
C22	8	15.2	20.23	6.35	8	3.06153	81.1	2	298.7	0.271779	0.5	0.119	0.484	0.174	17800	62770	29800	370.4	175.249
C23	9	15.01	20.12	5.89	7.98	2.42121	91.4	1.7	69.2	0.220959	0.8	0.119	0.484	0.174	17800	62770	29800	477.2	58.4812
C25	20	27.63	21.57	5.13	7.98	1.74087	52.7	1	4.5	1.41217	2.8	0.119	0.484	0.174	17800	62770	29800	326.3	7.63766
C27	60	30.19	20.73	4.01	8.39	1.14057	39.2	1.5	4.6	2.75815	2.4	0.119	0.484	0.174	17800	62770	29800	190.2	7.76313
C28	8	19.64	21.46	4.55	7.96	1.98099	112.1	3.5	176.6	0.301963	0.45	0.119	0.484	0.174	17800	62770	29800	33.4	118.051
C29	10	20.11	21.75	5.36	7.98	2.58129	84.8	3.4	211.6	0.212121	0.5	0.119	0.484	0.174	17800	62770	29800	45.2	135.227
C30	12	23.56	21.4	4.67	7.96	1.98099	71	2.7	46.4	0.0887208	0.55	0.119	0.484	0.174	17800	62770	29800	86	43.3699
C31	18	28.53	19.88	4.59	8.04	1.38069	44.4	1.4	11.9	2.07413	2	0.119	0.484	0.174	17800	62770	29800	122.3	15.7245
C32	36	29.66	19.15	4.81	8.06	1.46073	31.9	0.61	3.3	1.28714	2.1	0.119	0.484	0.174	17800	62770	29800	55.1	6.06945
C35	10	3	22.22	12.03	7.96	2.74137	79	1.4	56.2	0.333048	0.6	0.119	0.484	0.174	17800	62770	29800	29.8	50.0501
C36	18	3	22.22	10.45	7.94	2.50125	45.9	1.5	39.9	0.0850563	0.5	0.119	0.484	0.174	17800	62770	29800	49.4	38.745
C40	8	4.43	21.17	9.1	7.94	2.82141	70.7	1.2	92.4	0.124621	0.6	0.119	0.484	0.174	17800	62770	29800	25	72.6181
C2	1.51851	1.3294	1.34518	0.909556	0.974512	0.163978	1.83442	0.240549	0.886491	1.27005	0.60206	0.0488301	0.171434	0.0696681	4.25044	4.79776	4.47423	5.42756	1.05159
C3	1.54407	1.37328	1.35488	0.909021	0.97635	0.20452	1.83632	0.298853	0.792392	0.703851	0.69897	0.0488301	0.171434	0.0696681	4.25044	4.79776	4.47423	3.614	0.977816
C5	1.39794	1.43775	1.32077	0.758155	0.957607	0.288605	1.82217	0.25042	0.672098	0.892169	0.60206	0.0488301	0.171434	0.0696681	4.25044	4.79776	4.47423	5.26743	0.881171
C8	1.61278	1.42095	1.35622	0.83123	0.976808	0.348396	1.57519	0.271842	0.612784	0.433567	0.763428	0.0488301	0.171434	0.0696681	4.25044	4.79776	4.47423	3.20145	0.83218
C9	1.04139	1.42243	1.31006	0.770852	0.959995	0.609594	1.78888	0.342423	1.81757	1.10241	0.20412	0.0488301	0.171434	0.0696681	4.25044	4.79776	4.47423	5.50515	1.7529
C10	1.11394	1.41681	1.32654	0.952792	0.97359	0.554443	1.72754	0.267172	1.08636	0.661136	0.322219	0.0488301	0.171434	0.0696681	4.25044	4.79776	4.47423	6.04528	1.20497
C11	1.39794	1.45545	1.31112	0.854913	0.960946	0.371778	1.60206	0.271842	1.03743	1.31208	0.531479	0.0488301	0.171434	0.0696681	4.25044	4.79776	4.47423	4.05931	1.16772
C12	1.39794	1.45864	1.33082	0.886491	0.966142	0.328394	1.62325	0.292256	0.681241	0.136972	0.770852	0.0488301	0.171434	0.0696681	4.25044	4.79776	4.47423	3.15259	0.888634
C13	1.51851	1.4833	1.33224	0.705008	0.970812	0.174942	1.6902	0.30103	0.518514	0.307434	0.880814	0.0488301	0.171434	0.0696681	4.25044	4.79776	4.47423	3.40087	0.751757
C14	1.49136	1.47813	1.34183	0.80618	0.971276	0.299855	1.43616	0.212188	0.643453	0.585471	0.724276	0.0488301	0.171434	0.0696681	4.25044	4.79776	4.47423	0	0.857643
C20	1.66276	1.50092	1.35102	0.777427	0.972666	0.360337	1.51851	0.269513	0.740363	0.347495	0.732394	0.0488301	0.171434	0.0696681	4.25044	4.79776	4.47423	2.29226	0.936396
C21	0.845098	1.18184	1.33183	0.891537	0.95376	0.717846	1.94988	0.447158	2.46583	0.088857	0.176091	0.0488301	0.171434	0.0696681	4.25044	4.79776	4.47423	2.13988	2.23798
C22	0.954243	1.20952	1.32695	0.866287	0.954243	0.60869	1.91434	0.477121	2.47669	0.104412	0.176091	0.0488301	0.171434	0.0696681	4.25044	4.79776	4.47423	2.56984	2.24613
C23	1	1.20439	1.32469	0.838219	0.953276	0.53418	1.96567	0.431364	1.84634	0.086701	0.255273	0.0488301	0.171434	0.0696681	4.25044	4.79776	4.47423	2.67961	1.77438
C25	1.32222	1.45682	1.35353	0.78746	0.953276	0.437889	1.72997	0.30103	0.740363	0.382409	0.579784	0.0488301	0.171434	0.0696681	4.25044	4.79776	4.47423	2.51495	0.936396
C27	1.78533	1.49402	1.33706	0.699838	0.972666	0.330529	1.60423	0.39794	0.748188	0.574974	0.531479	0.0488301	0.171434	0.0696681	4.25044	4.79776	4.47423	2.28149	0.942659
C28	0.954243	1.31471	1.35141	0.744293	0.952308	0.474361	2.05346	0.653213	2.24944	0.114599	0.161368	0.0488301	0.171434	0.0696681	4.25044	4.79776	4.47423	1.53656	2.07573
C29	1.04139	1.32449	1.35698	0.803457	0.953276	0.55404	1.93349	0.643453	2.32756	0.0835458	0.176091	0.0488301	0.171434	0.0696681	4.25044	4.79776	4.47423	1.66464	2.13426
C30	1.11394	1.39023	1.35025	0.753583	0.952308	0.474361	1.85733	0.568202	1.67578	0.0369165	0.190332	0.0488301	0.171434	0.0696681	4.25044	4.79776	4.47423	1.93952	1.64709
C31	1.27875	1.47026	1.31973	0.747412	0.956168	0.376703	1.65706	0.380211	1.11059	0.487722	0.477121	0.0488301	0.171434	0.0696681	4.25044	4.79776	4.47423	2.09096	1.22335
C32	1.5682	1.48657	1.30428	0.764176	0.957128	0.391064	1.5172	0.206826	0.633468	0.359292	0.491362	0.0488301	0.171434	0.0696681	4.25044	4.79776	4.47423	1.74896	0.849386
C35	1.04139	0.60206	1.36586	1.11494	0.952308	0.573031	1.90309	0.380211	1.7574	0.124846	0.20412	0.0488301	0.171434	0.0696681	4.25044	4.79776	4.47423	1.48855	1.708
C36	1.27875	0.60206	1.36586	1.05881	0.951338	0.544223	1.67117	0.39794	1.61172	0.0354523	0.176091	0.0488301	0.171434	0.0696681	4.25044	4.79776	4.47423	1.70243	1.59928
C40	0.954243	0.7348	1.34577	1.00432	0.951338	0.582224	1.85552	0.342423	1.97035	0.0510061	0.20412	0.0488301	0.171434	0.0696681	4.25044	4.79776	4.47423	1.41497	1.86698

## Sheet: 2007
		(m)		(oC)	(mg/L)		(mg/L)	(μmol/L)	(μmol/L)	(mg/L)		透明度	泥沙4月	泥沙12-04	泥沙5月	径流04月	径流12-04	径流05月	浮游植物
		Depth	S	T	DO	PH	COD	TN	TP	TSM	Chla	Trans	sediment04	sediment12-04	sediment05	runoff10	runoff06-10	runoff11	phyto	tur
D2		30	25.02	nodata	5.9	8.57	0.73	41.555	0.2075	5	0.854823	4	0.081	0.336	0.089	16900	70700	19900	4.60339e+07	11.9851
D3		34	27.32	18.69	6.7	8.62	1.19	42	0.2	2.3	0.743807	6	0.081	0.336	0.089	16900	70700	19900	1150503	7.82088
D6		35	27.95	18.43	8	8.36	1.19	55.9425	0.1675	3.2	1.49872	3	0.081	0.336	0.089	16900	70700	19900	1506978	9.37551
D10		12	22.48	19.28	7.8	8.46	0.73	75.45	0.7975	3.5	0.408774	2	0.081	0.336	0.089	16900	70700	19900	194800	9.84888
D11		24	20.12	19.68	3.9	8.46	0.96	85.1025	0.875	4.7	0.888128	1.5	0.081	0.336	0.089	16900	70700	19900	52055	11.5835
D16		8	17.63	18.98	7.2	8.36	1.55	110.2	0.9075	7.1	0.213225	4	0.081	0.336	0.089	16900	70700	19900	154077	14.5421
D17		20	24.94	18.82	8.3	8.41	1.55	67.525	0.735	6.2	0.24416	4	0.081	0.336	0.089	16900	70700	19900	26250	13.4941
D18		35	23.07	18.53	7.9	8.38	4.24	86.775	0.985	4.1	0.234216	5	0.081	0.336	0.089	16900	70700	19900	155961	10.7445
D20		36	29.27	18.21	10.2	8.71	0.76	54.635	0.6425	1.2	0.976941	5	0.081	0.336	0.089	16900	70700	19900	448500	5.47728
D21		7	18.86	18.82	7.8	8.36	2.44	123.493	1.8675	54.4	0.632791	0.3	0.081	0.336	0.089	16900	70700	19900	322400	45.0679
D22		5	13.34	19.13	9.1	8.34	3.42	146.868	1.5775	29.9	0.361268	0.3	0.081	0.336	0.089	16900	70700	19900	437224	32.2733
D23		10	21.87	18.8	7.7	8.41	1.19	107.403	3.645	194.4	0.888128	0.3	0.081	0.336	0.089	16900	70700	19900	3046856	92.1072
D25		20	21.99	19.07	8	8.44	1.94	81.1875	1.2175	4.9	0.366792	1.1	0.081	0.336	0.089	16900	70700	19900	116500	11.8524
D26		49	30.42	18.07	9.6	8.56	1.27	35.7125	0.295	1.3	2.86848	2	0.081	0.336	0.089	16900	70700	19900	1212981	5.72225
D28		6.8	23.3	18.22	9.8	8.33	2.6	108.745	1.5925	541.4	0.247474	0.3	0.081	0.336	0.089	16900	70700	19900	49000	164.366
D29		10	25.22	18.05	9	8.35	2.05	82.3075	1.5625	190.8	0.503272	0.3	0.081	0.336	0.089	16900	70700	19900	266000	91.1421
D30		11	27.94	17.65	8	8.38	1.58	67.6525	1.1175	11.1	0.732706	0.9	0.081	0.336	0.089	16900	70700	19900	400044	18.617
D31		12	28.61	17.81	8.4	8.39	1.7	69.23	1.2525	73.2	0.506973	0.3	0.081	0.336	0.089	16900	70700	19900	253600	53.2101
D32		46	30.15	17.68	7.8	8.33	1.43	59.21	0.735	4.8	1.19527	2.6	0.081	0.336	0.089	16900	70700	19900	5605	11.7186
D33		48	30.3	18.17	9.8	8.47	1.27	52.995	0.43	4	2.57427	3	0.081	0.336	0.089	16900	70700	19900	42673	10.5994
D34		52	31.25	18.16	9.3	8.54	1.55	38.5875	0.4	1.5	0.23974	2.5	0.081	0.336	0.089	16900	70700	19900	16072	6.18812
D35		13	3	19.72	8.9	8.18	1.04	176.18	2.5	28.1	0.810417	0.3	0.081	0.336	0.089	16900	70700	19900	38000	31.1767
D36		10	3	20.28	8.6	8.19	2.09	156.145	1.4975	41.1	0.699401	0.4	0.081	0.336	0.089	16900	70700	19900	57050	38.536
D38		6	3	20.3	8.3	8.18	2.6	168.387	2.7725	56	1.04355	0.4	0.081	0.336	0.089	16900	70700	19900	81000	45.8041
D39		9	3	20.53	7.1	7.95	2.52	165.42	4.275	84	1.16197	0.4	0.081	0.336	0.089	16900	70700	19900	45838	57.4752
D2	D2	1.49136	1.41531		0.838849	0.980912	0.238046	1.62895	0.0818871	0.778151	0.268302	0.69897	0.0338257	0.125806	0.0370279	4.22791	4.84943	4.29887	7.66308	1.11344
D3	D3	1.54407	1.45209	1.29425	0.886491	0.983175	0.340444	1.63347	0.0791812	0.518514	0.241498	0.845098	0.0338257	0.125806	0.0370279	4.22791	4.84943	4.29887	6.06089	0.945512
D6	D6	1.5563	1.46165	1.28847	0.954243	0.971276	0.340444	1.75544	0.0672569	0.623249	0.397717	0.60206	0.0338257	0.125806	0.0370279	4.22791	4.84943	4.29887	6.17811	1.01601
D10	D10	1.11394	1.3707	1.30707	0.944483	0.975891	0.238046	1.88338	0.254669	0.653213	0.148841	0.477121	0.0338257	0.125806	0.0370279	4.22791	4.84943	4.29887	5.28959	1.03538
D11	D11	1.39794	1.32469	1.31555	0.690196	0.975891	0.292256	1.93502	0.273001	0.755875	0.276031	0.39794	0.0338257	0.125806	0.0370279	4.22791	4.84943	4.29887	4.71647	1.0998
D16	D16	0.954243	1.27021	1.3006	0.913814	0.971276	0.40654	2.0461	0.280465	0.908485	0.0839415	0.69897	0.0338257	0.125806	0.0370279	4.22791	4.84943	4.29887	5.18774	1.19151
D17	D17	1.32222	1.41397	1.2971	0.968483	0.97359	0.40654	1.83585	0.239299	0.857332	0.0948761	0.69897	0.0338257	0.125806	0.0370279	4.22791	4.84943	4.29887	4.41915	1.16119
D18	D18	1.5563	1.38148	1.2907	0.94939	0.972203	0.719331	1.94337	0.297761	0.70757	0.0913913	0.778151	0.0338257	0.125806	0.0370279	4.22791	4.84943	4.29887	5.19302	1.06983
D20	D20	1.5682	1.48101	1.28353	1.04922	0.987219	0.245513	1.74535	0.215505	0.342423	0.295994	0.778151	0.0338257	0.125806	0.0370279	4.22791	4.84943	4.29887	5.65176	0.811393
D21	D21	0.90309	1.29798	1.2971	0.944483	0.971276	0.536558	2.09514	0.457503	1.74351	0.212931	0.113943	0.0338257	0.125806	0.0370279	4.22791	4.84943	4.29887	5.5084	1.6634
D22	D22	0.778151	1.15655	1.30384	1.00432	0.970347	0.645422	2.16987	0.411199	1.48996	0.133944	0.113943	0.0338257	0.125806	0.0370279	4.22791	4.84943	4.29887	5.6407	1.5221
D23	D23	1.04139	1.35927	1.29667	0.939519	0.97359	0.340444	2.03504	0.666986	2.29092	0.276031	0.113943	0.0338257	0.125806	0.0370279	4.22791	4.84943	4.29887	6.48385	1.96898
D25	D25	1.32222	1.36154	1.30255	0.954243	0.974972	0.468347	1.91481	0.345864	0.770852	0.135702	0.322219	0.0338257	0.125806	0.0370279	4.22791	4.84943	4.29887	5.06633	1.10898
D26	D26	1.69897	1.49721	1.28035	1.02531	0.980458	0.356026	1.56481	0.11227	0.361728	0.58754	0.477121	0.0338257	0.125806	0.0370279	4.22791	4.84943	4.29887	6.08385	0.827515
D28	D28	0.892095	1.38561	1.28375	1.03342	0.969882	0.556303	2.04038	0.413719	2.73432	0.0960315	0.113943	0.0338257	0.125806	0.0370279	4.22791	4.84943	4.29887	4.6902	2.21845
D29	D29	1.04139	1.41863	1.27989	1	0.970812	0.4843	1.92068	0.408664	2.28285	0.177038	0.113943	0.0338257	0.125806	0.0370279	4.22791	4.84943	4.29887	5.42488	1.96446
D30	D30	1.07918	1.4615	1.27068	0.954243	0.972203	0.41162	1.83666	0.325823	1.08279	0.238725	0.278754	0.0338257	0.125806	0.0370279	4.22791	4.84943	4.29887	5.60211	1.29263
D31	D31	1.11394	1.47144	1.27439	0.973128	0.972666	0.431364	1.84652	0.352665	1.8704	0.178105	0.113943	0.0338257	0.125806	0.0370279	4.22791	4.84943	4.29887	5.40415	1.73408
D32	D32	1.6721	1.49346	1.27138	0.944483	0.969882	0.385606	1.77967	0.239299	0.763428	0.341488	0.556303	0.0338257	0.125806	0.0370279	4.22791	4.84943	4.29887	3.74865	1.10444
D33	D33	1.6902	1.49554	1.28262	1.03342	0.97635	0.356026	1.73235	0.155336	0.69897	0.553188	0.60206	0.0338257	0.125806	0.0370279	4.22791	4.84943	4.29887	4.63016	1.06444
D34	D34	1.72428	1.50853	1.2824	1.01284	0.979548	0.40654	1.59756	0.146128	0.39794	0.0933308	0.544068	0.0338257	0.125806	0.0370279	4.22791	4.84943	4.29887	4.2061	0.856615
D35	D35	1.14613	0.60206	1.31639	0.995635	0.962843	0.30963	2.24841	0.544068	1.46389	0.257779	0.113943	0.0338257	0.125806	0.0370279	4.22791	4.84943	4.29887	4.5798	1.50754
D36	D36	1.04139	0.60206	1.32797	0.982271	0.963316	0.489958	2.1963	0.397505	1.62428	0.230296	0.146128	0.0338257	0.125806	0.0370279	4.22791	4.84943	4.29887	4.75626	1.59699
D38	D38	0.845098	0.60206	1.32838	0.968483	0.962843	0.556303	2.22888	0.576629	1.75587	0.310385	0.146128	0.0338257	0.125806	0.0370279	4.22791	4.84943	4.29887	4.90849	1.67028
D39	D39	1	0.60206	1.33304	0.908485	0.951823	0.546543	2.22121	0.722222	1.92942	0.334849	0.146128	0.0338257	0.125806	0.0370279	4.22791	4.84943	4.29887	4.66124	1.76697
