# Supplementary material for: Ichthyoplankton assemblage structure of springs in the Yangtze Estuary revealed by biological and environmental visions
Source: PeerJ. 2015 Aug 18;3:e1186. doi: 10.7717/peerj.1186 (PMC4548499; doi:10.7717/peerj.1186)
Supplement: Supplemental Information 2 [file peerj-03-1186-s002.xls]

## Sheet: LOG转化去稀有种
	白姑鱼	白氏银汉鱼	赤鼻棱鳀	鲷科	东方鲀属	短吻三线舌鳎	多鳞鱚	凤鲚	寡鳞飘鱼	褐菖鲉	黄鲫	康氏小公鱼	六丝矛尾鰕虎鱼	鳗鲡科	矛尾复鰕虎鱼	矛尾鰕虎鱼	七星底灯鱼	前颌间银鱼	舌鳎属	松江鲈	鲐	鳀	细条天竺鲷	鰕虎鱼科	小黄鱼	银鲳	银飘鱼	鲬	有明银鱼
	Parg	Cdla	Tkam	SPCr	Tfug	ECDD	Ssih	Emys	PAng	SmCr	StCt	CEom	EhAx	Cngu	Shas	Esti	DptA	Hpro	Eyno	TfCs	PjCp	AjCp	Elin	GoDi	Ppol	PCrg	Psin	PinB	SEri
A2	0	108	0	0	0	0	0	7	0	0	0	0	181	0	0	0	0	0	0	0	0	42	0	0	3	0	0	0	0
A5	0	0	0	3	0	0	0	3	0	0	0	0	5	0	0	0	4	0	0	0	0	1	0	0	4	6	0	1	0
A6	0	0	0	0	0	0	0	0	0	0	0	0	9	0	0	0	0	0	0	0	0	20	0	0	8	1	0	1	0
A7	0	0	0	0	0	0	0	0	0	0	0	0	122	0	0	0	0	0	0	0	0	1029	0	0	3	1	0	0	0
A9	0	46	0	6	0	0	0	0	0	0	0	0	1	0	0	0	0	0	0	0	0	0	0	0	0	2	0	0	0
A10	0	7	0	0	0	0	0	5	0	0	0	0	3	0	0	0	0	0	0	0	0	1	0	0	1	0	0	1	0
A11	0	3	0	0	0	0	0	0	0	0	0	0	3	0	0	0	2	0	0	0	0	0	0	0	0	2	0	0	0
A12	0	1	0	0	0	0	0	0	0	0	0	0	0	0	0	0	0	79	0	0	1	5	0	0	0	0	0	0	0
A13	0	0	0	0	0	0	0	129	0	0	0	0	0	0	0	0	0	0	0	0	1	10	0	0	0	2	0	0	0
A15	0	22	0	0	0	0	0	3	0	0	0	0	1	0	0	0	0	0	0	0	0	1	0	0	0	0	0	0	0
A16	0	2	0	0	0	0	0	0	0	0	0	0	0	0	0	0	0	0	0	0	0	0	0	0	0	0	0	0	0
A17	0	0	0	0	0	0	0	0	0	0	0	0	2	0	0	0	7	0	0	1	0	0	0	0	0	0	0	0	0
A18	0	0	0	0	0	0	0	0	0	0	0	0	0	0	0	0	0	0	0	0	0	7	0	0	0	0	0	0	0
A19	0	0	0	0	0	0	0	1	0	0	0	0	0	0	0	0	0	0	0	0	0	78	0	0	2	0	0	0	0
A21	0	0	0	0	0	0	0	2	0	0	0	0	0	0	0	0	0	0	0	0	0	0	0	0	0	0	0	0	0
A22	0	4	0	0	0	0	0	5	0	0	0	0	1	0	0	0	0	0	0	12	0	1	0	0	0	0	0	0	0
A23	0	0	0	0	0	0	0	1	0	0	0	0	0	0	0	0	0	0	0	0	0	1	0	0	0	0	0	0	0
A24	0	1	0	0	0	0	0	12	0	0	0	0	0	0	0	0	2	0	0	0	0	0	0	0	0	1	0	0	0
A25	0	0	0	0	0	0	0	0	0	0	0	0	4	0	0	0	7	0	0	0	0	0	0	0	0	1	0	0	0
A26	0	0	0	0	0	0	0	0	0	0	0	0	0	0	0	0	0	0	0	0	0	5	0	0	1	0	0	0	0
A28	0	51	0	0	0	0	0	0	0	0	0	0	0	0	0	0	0	0	0	12	0	2	0	0	0	0	0	0	0
A29	0	2	0	0	0	0	0	0	0	0	0	0	1	0	0	0	6	0	0	9	0	0	0	0	0	0	0	0	0
A30	0	8	0	0	2	0	0	8	0	0	0	0	5	0	0	0	42	0	0	1	1	0	0	0	0	2	0	0	0
A31	0	11	0	0	0	0	0	6	0	0	0	0	12	0	0	0	15	0	0	1	0	5	0	0	4	4	0	1	0
A32	0	0	0	0	0	0	0	0	0	0	0	0	4	0	0	0	0	0	0	0	0	12	0	0	0	1	0	0	0
A33	0	0	0	0	0	0	0	1	0	0	0	0	0	0	0	0	0	0	0	0	0	60	0	0	0	0	0	0	0
A35	0	0	0	0	0	0	0	100	0	0	0	0	0	0	0	0	0	0	0	0	0	0	0	0	0	0	0	0	0
A36	0	0	0	0	0	0	0	21	0	0	0	0	0	0	0	0	0	0	0	0	0	0	0	0	0	0	0	0	0
A37	0	0	0	0	0	0	0	137	0	0	0	0	0	0	0	0	0	0	0	0	0	0	0	0	0	0	0	0	0
A38	0	0	0	0	0	0	0	27	0	0	0	0	0	0	0	0	0	0	0	0	0	0	0	0	0	0	0	0	0
A39	0	0	0	0	0	0	0	7	0	0	0	0	0	0	0	0	0	0	0	27	0	0	0	0	0	0	0	0	0
A40	0	16	0	0	0	0	0	42	0	0	0	0	5	0	0	0	0	0	0	0	0	0	0	0	0	0	0	0	0
B1	0	0	0	0	0	2	0	0	0	0	0	0	0	0	0	2	0	0	0	0	0	0	0	0	14	0	0	0	0
B2	0	0	0	0	0	0	0	0	0	0	0	0	0	0	0	2	0	0	0	0	0	0	0	0	0	0	0	0	0
B3	0	0	0	0	0	1	0	0	0	1	0	0	1	3	0	2	0	0	0	0	0	15	0	0	0	0	0	0	0
B5	0	10	0	0	0	0	0	0	0	0	0	0	8	0	0	1	0	0	0	0	0	98	0	2	0	0	0	0	0
B6	0	2	0	0	0	0	0	0	0	0	0	1	5	0	0	0	0	0	0	0	0	2	0	0	1	3	0	0	0
B7	0	0	0	0	0	0	0	0	0	0	0	0	5	0	0	2	0	0	0	0	1	138	0	0	4	0	0	0	0
B9	0	2	92	0	0	0	0	13	0	0	0	0	5	0	0	0	0	0	0	0	0	0	0	0	1	1	0	0	0
B10	0	19	0	0	0	0	0	0	0	0	0	0	0	0	0	0	0	0	0	0	0	1	0	0	1	0	0	0	0
B11	0	2	0	0	0	0	0	0	0	0	0	12	2	0	0	1	0	0	0	0	1	0	0	0	0	0	0	0	0
B12	0	0	0	0	0	0	0	0	0	0	0	0	0	0	0	0	0	0	0	0	0	0	0	0	1	0	0	0	0
B13	0	0	0	0	0	1	0	0	0	0	0	0	0	0	0	0	0	0	0	0	0	1	0	0	0	0	0	0	0
B15	0	35	0	0	0	0	0	0	0	0	0	0	2	0	0	0	0	0	0	31	0	46	0	0	1	0	0	0	0
B16	0	1	0	0	0	0	0	0	0	0	0	0	0	0	0	0	0	0	0	0	0	3	0	0	0	0	0	0	0
B17	0	0	0	0	0	0	0	0	0	0	0	0	0	0	0	1	0	0	0	0	0	0	0	0	0	0	0	0	0
B18	0	0	0	0	0	0	0	0	0	0	0	0	0	0	0	2	0	0	0	0	0	0	0	0	0	0	0	0	0
B19	0	0	0	0	0	0	0	0	0	0	0	0	0	0	0	0	0	0	0	0	0	38	0	0	0	0	0	0	0
B21	0	40	0	0	0	0	0	22	0	0	0	0	0	0	47	6	0	0	0	3	0	0	0	0	0	0	0	2	0
B22	0	29	0	0	0	0	0	1	0	0	0	0	0	0	10	29	0	0	0	0	0	0	0	0	2	0	0	0	0
B23	0	27	0	0	3	0	0	0	0	0	0	0	0	0	0	1	0	0	0	146	0	0	0	0	0	0	0	0	0
B24	0	6	0	0	0	1	0	0	0	0	0	0	0	0	0	2	0	0	0	1	0	14	0	0	11	0	0	0	0
B25	0	1	0	0	0	0	0	0	0	6	0	0	0	0	0	0	0	0	0	0	1	0	0	0	3	0	0	9	0
B26	0	0	0	0	0	0	0	0	0	0	0	0	11	1	0	0	0	0	0	0	0	46	0	0	0	0	0	0	0
B28	0	10	0	0	0	0	0	0	0	0	0	0	11	0	0	1	0	0	0	46	0	0	0	0	0	0	0	0	0
B29	0	0	0	0	0	0	0	0	0	0	0	0	0	0	0	215	5	0	0	686	0	4	0	0	1	0	0	0	0
B30	0	27	0	0	0	0	0	0	0	7	0	0	0	0	0	1	0	0	0	39	0	195	0	0	0	1	0	0	0
B31	0	0	0	0	0	0	0	0	0	4	0	0	0	0	1	0	0	0	1	0	1	4	0	0	0	0	0	5	0
B32	0	1	0	0	0	0	0	0	0	0	0	1	0	0	0	0	0	0	0	0	0	0	0	0	0	0	0	2	0
B33	0	0	0	0	0	0	0	0	0	0	0	0	0	0	0	0	0	0	1	0	1	0	0	0	1	0	0	0	0
B35	0	0	0	0	0	0	0	1176	0	0	0	0	0	0	1	0	0	0	0	0	0	0	0	0	0	0	0	0	0
B36	0	0	0	0	0	0	0	3029	0	0	5	0	0	0	0	0	0	0	0	0	0	0	0	1	0	0	0	0	0
B37	0	0	0	0	0	0	0	1384	0	0	0	0	0	0	0	0	0	0	0	0	0	0	0	0	0	0	0	0	0
B38	0	0	0	0	0	0	0	661	0	0	5	1	0	0	0	0	0	0	0	0	0	0	0	2	0	0	0	0	0
B39	0	0	0	0	0	0	0	19	0	0	0	0	0	0	0	0	0	0	0	0	0	0	0	0	0	0	2	0	0
B40	0	1	0	0	0	0	0	48	0	0	1	0	0	0	0	1	0	0	0	0	0	0	0	0	26	0	0	0	0
C2	0	0	0	0	0	0	0	0	0	0	0	1	0	0	0	0	0	1	0	0	0	0	0	0	0	0	0	0	0
C3	0	0	0	0	0	0	0	1	0	0	0	0	0	0	0	0	0	0	0	0	0	0	0	0	0	0	0	0	0
C5	0	1	0	0	0	0	0	0	0	0	0	0	0	0	0	0	0	0	0	0	0	3	0	0	0	0	0	0	0
C8	0	0	0	0	0	0	0	0	0	0	0	0	0	0	0	0	0	0	0	0	0	0	0	0	1	0	0	0	0
C9	0	12	0	0	0	0	0	0	0	0	0	0	0	0	0	0	0	0	0	0	0	2	0	0	0	0	0	0	0
C10	0	0	0	0	0	0	0	0	0	0	0	0	0	0	0	0	0	0	0	0	0	6	0	0	0	0	0	0	0
C11	0	0	0	0	0	0	0	0	0	0	0	0	0	0	0	0	0	0	0	0	0	0	0	0	0	0	1	0	0
C12	0	0	0	0	0	0	0	15	1	0	0	0	0	0	0	0	2	0	0	0	0	0	0	0	0	0	0	0	0
C13	0	1	0	0	0	0	0	0	0	0	0	1	0	0	0	0	0	0	0	0	0	20	0	0	0	0	0	0	0
C14	0	0	0	0	0	0	0	1	0	0	0	0	0	0	0	0	0	0	0	0	0	0	0	0	0	0	0	0	0
C20	0	0	0	0	0	0	0	1	0	0	0	0	0	0	0	0	0	0	0	0	0	0	0	0	0	0	0	0	0
C21	0	0	0	0	0	0	0	2	1	0	0	0	0	0	0	0	0	0	0	5	0	1	0	0	0	0	0	0	0
C22	0	0	0	0	0	0	0	0	0	0	0	0	1	0	0	0	0	0	0	16	0	0	0	0	0	0	0	0	0
C23	0	2	0	0	0	0	0	0	0	0	0	0	0	0	0	0	0	0	0	1	0	0	0	0	0	0	0	0	0
C25	0	1	0	0	0	0	0	0	0	0	0	1	0	0	0	0	0	0	0	0	0	0	0	0	0	0	0	0	0
C27	0	1	0	0	0	0	0	0	0	0	0	0	0	0	0	0	0	0	0	0	0	1	0	0	0	0	0	0	0
C28	0	7	0	0	0	0	0	0	1	0	0	0	0	0	0	0	0	0	0	19	0	0	0	0	0	0	0	0	0
C29	0	10	0	0	0	0	0	0	0	0	0	0	1	0	0	0	0	0	0	51	0	0	0	0	0	0	0	0	0
C30	0	61	0	0	0	0	0	2	0	0	0	4	0	0	0	1	0	0	0	0	0	0	2	0	0	0	0	0	0
C31	0	0	0	0	0	0	0	0	0	0	0	3	3	0	0	0	0	1	0	0	0	1	0	0	0	0	0	0	0
C32	0	3	0	0	0	0	0	2	0	0	0	0	0	0	0	0	0	0	0	0	0	0	0	0	0	0	0	0	0
C35	0	0	0	0	0	0	0	52	0	0	0	0	0	0	0	0	0	0	0	0	0	0	0	0	0	0	1	0	0
C36	0	0	0	0	0	0	0	12	0	0	0	0	0	0	0	0	0	0	0	0	0	0	0	0	0	0	0	0	0
C40	0	0	0	0	0	0	0	0	0	0	0	0	0	0	0	0	0	0	0	0	0	6	0	0	0	0	0	0	0
D2	0	0	0	0	0	0	0	0	0	0	0	0	1	0	0	0	0	0	0	0	0	2	0	0	0	0	0	0	0
D3	0	0	0	0	0	0	0	0	0	0	0	0	0	0	0	0	0	0	0	0	0	4	0	0	0	0	0	0	0
D6	0	0	0	0	0	0	0	0	0	0	0	0	0	0	0	0	0	0	0	0	0	0	0	0	2	0	0	0	0
D10	0	0	0	0	0	0	0	0	0	0	0	0	0	0	0	0	0	0	0	0	0	1	0	0	0	0	0	0	0
D11	0	0	0	0	0	0	0	0	0	0	0	0	0	0	0	0	0	0	0	0	0	11	0	0	0	0	0	0	0
D16	0	3	0	0	1	0	0	0	0	0	0	0	0	0	0	0	0	0	0	1	0	1	0	0	0	1	0	0	0
D17	0	5	0	0	0	0	0	0	0	0	0	0	0	0	0	0	0	0	0	1	0	0	0	0	0	0	0	0	0
D18	0	1	0	0	0	0	0	0	0	0	0	0	0	0	0	0	0	0	0	1	0	0	0	0	0	0	0	0	0
D20	0	0	0	0	0	0	0	1	0	0	0	0	0	0	0	0	0	0	0	0	0	0	0	0	0	0	0	0	0
D21	0	0	0	0	0	0	0	4	0	0	0	1	0	0	0	0	0	0	0	0	0	0	0	0	0	0	0	0	0
D22	0	0	0	0	0	0	0	8	0	0	0	0	0	0	0	0	0	0	0	0	0	0	0	1	0	0	0	0	0
D23	0	85	0	0	0	0	0	0	0	0	0	3	0	0	0	0	0	0	0	116	0	3	1	0	0	1	0	0	0
D25	0	0	0	0	0	0	0	0	0	0	0	0	0	0	0	0	0	0	0	0	0	9	0	0	0	0	0	0	0
D26	0	1	0	0	0	0	0	0	0	0	0	0	0	0	0	0	0	0	0	0	0	0	0	0	0	0	0	0	0
D28	0	0	0	0	0	0	0	0	0	0	0	0	0	0	0	0	0	0	0	0	0	0	0	0	0	0	0	0	1
D29	0	45	0	0	0	0	0	0	0	0	0	0	0	0	0	0	0	0	0	0	0	0	0	0	0	0	0	0	0
D30	0	69	0	0	0	0	0	0	0	0	0	0	0	0	0	0	0	0	0	0	0	0	0	0	0	0	0	0	0
D31	0	0	1	0	1	0	0	0	0	0	0	0	0	0	0	0	0	0	0	0	0	4	0	0	0	0	0	0	1
D32	0	2	0	0	0	0	0	0	0	0	0	0	0	0	0	0	0	0	0	0	0	1	0	0	1	0	0	0	0
D33	0	1	0	0	0	0	0	11	0	0	0	0	0	0	0	0	0	0	0	0	0	0	0	0	0	0	0	0	0
D34	0	5	0	0	0	0	0	0	0	0	0	0	0	0	0	0	1	0	0	0	0	0	0	0	0	0	0	0	0
D35	0	0	0	0	0	0	0	124	0	0	0	0	0	0	0	0	0	0	0	0	0	0	0	0	0	0	0	0	0
D36	0	0	0	0	0	0	0	55	0	0	0	0	0	0	0	0	0	0	0	0	0	0	0	0	0	0	0	0	0
D38	0	0	0	0	0	0	0	20	0	0	0	0	0	0	0	0	0	0	0	0	0	0	0	0	0	0	0	0	0
D39	0	0	0	0	0	0	0	1	0	0	0	0	0	0	0	0	0	0	0	0	0	0	0	0	0	0	0	0	0
E6	0	0	0	0	0	0	0	0	0	0	0	0	0	0	0	0	0	0	0	0	0	4	0	0	0	8	0	0	0
E7	0	2	0	0	0	0	0	0	0	0	0	0	0	0	0	0	0	0	0	0	0	0	0	0	0	0	0	0	0
E10	1	0	0	0	0	0	0	0	0	0	0	0	0	0	0	0	0	0	1	1	0	2	0	1	1	0	0	0	0
E11	0	1	1	0	0	0	3	0	0	0	0	0	0	0	0	0	0	0	0	0	0	1	0	1	0	0	0	0	0
E15	36	4	1	0	0	0	5	0	0	0	0	0	0	0	0	0	0	0	0	14	0	0	0	0	0	0	0	0	0
E16	0	0	0	0	0	0	0	0	0	0	0	0	0	0	0	0	0	0	0	0	0	19	0	0	0	0	0	0	0
E17	10	0	0	0	0	0	0	0	0	0	0	0	0	0	0	1	0	0	0	0	0	61	0	0	0	16	0	0	0
E20	0	0	0	0	0	0	0	0	0	0	0	0	0	0	0	0	0	0	0	0	0	5	0	0	0	0	0	0	0
E22	0	0	0	0	1	0	0	0	0	0	0	0	0	0	0	0	0	0	0	19	0	0	0	63	2	0	0	0	0
E23	11	0	0	0	0	0	0	0	0	0	0	0	0	0	0	0	0	0	3	21	0	0	0	11	21	0	0	0	0
E27	0	0	0	0	0	0	0	0	0	0	0	0	0	0	0	0	0	0	0	0	0	2	0	0	0	0	0	0	0
E28	0	5	0	0	0	0	0	0	0	0	0	0	0	0	0	0	0	0	0	1	0	0	0	0	0	0	0	0	0
E29	0	2	0	0	0	0	0	0	0	0	0	0	0	0	0	0	0	0	0	1	0	0	0	2	0	0	0	0	0
E30	0	3	0	0	0	0	0	0	0	0	0	0	0	0	0	0	0	0	0	0	0	0	0	0	0	0	0	0	0
E33	0	1	0	0	0	0	0	0	0	0	0	0	0	0	0	0	0	0	0	0	0	13	0	0	0	0	0	0	0
E34	0	1	0	0	0	0	0	0	0	0	0	0	0	0	0	0	0	0	0	0	0	0	0	0	0	0	0	0	0
E35	0	0	0	0	0	0	0	262	0	0	0	0	0	0	0	0	0	0	0	0	0	0	0	0	0	0	0	0	0
E36	0	0	0	0	0	0	0	9	0	0	0	0	0	0	0	0	0	0	0	0	0	0	0	0	0	0	0	0	0
E37	0	0	0	0	0	0	0	80	0	0	0	0	0	0	0	0	0	0	0	0	0	0	0	0	0	0	0	0	0
	Parg	Cdla	Tkam	SPCr	Tfug	ECDD	Ssih	Emys	PAng	SmCr	StCt	CEom	EhAx	Cngu	Shas	Esti	DptA	Hpro	Eyno	TfCs	PjCp	AjCp	Elin	GoDi	Ppol	PCrg	Psin	PinB	SEri
A2	0	2.03743	0	0	0	0	0	0.90309	0	0	0	0	2.26007	0	0	0	0	0	0	0	0	1.63347	0	0	0.60206	0	0	0	0
A5	0	0	0	0.60206	0	0	0	0.60206	0	0	0	0	0.778151	0	0	0	0.69897	0	0	0	0	0.30103	0	0	0.69897	0.845098	0	0.30103	0
A6	0	0	0	0	0	0	0	0	0	0	0	0	1	0	0	0	0	0	0	0	0	1.32222	0	0	0.954243	0.30103	0	0.30103	0
A7	0	0	0	0	0	0	0	0	0	0	0	0	2.08991	0	0	0	0	0	0	0	0	3.01284	0	0	0.60206	0.30103	0	0	0
A9	0	1.6721	0	0.845098	0	0	0	0	0	0	0	0	0.30103	0	0	0	0	0	0	0	0	0	0	0	0	0.477121	0	0	0
A10	0	0.90309	0	0	0	0	0	0.778151	0	0	0	0	0.60206	0	0	0	0	0	0	0	0	0.30103	0	0	0.30103	0	0	0.30103	0
A11	0	0.60206	0	0	0	0	0	0	0	0	0	0	0.60206	0	0	0	0.477121	0	0	0	0	0	0	0	0	0.477121	0	0	0
A12	0	0.30103	0	0	0	0	0	0	0	0	0	0	0	0	0	0	0	1.90309	0	0	0.30103	0.778151	0	0	0	0	0	0	0
A13	0	0	0	0	0	0	0	2.11394	0	0	0	0	0	0	0	0	0	0	0	0	0.30103	1.04139	0	0	0	0.477121	0	0	0
A15	0	1.36173	0	0	0	0	0	0.60206	0	0	0	0	0.30103	0	0	0	0	0	0	0	0	0.30103	0	0	0	0	0	0	0
A16	0	0.477121	0	0	0	0	0	0	0	0	0	0	0	0	0	0	0	0	0	0	0	0	0	0	0	0	0	0	0
A17	0	0	0	0	0	0	0	0	0	0	0	0	0.477121	0	0	0	0.90309	0	0	0.30103	0	0	0	0	0	0	0	0	0
A18	0	0	0	0	0	0	0	0	0	0	0	0	0	0	0	0	0	0	0	0	0	0.90309	0	0	0	0	0	0	0
A19	0	0	0	0	0	0	0	0.30103	0	0	0	0	0	0	0	0	0	0	0	0	0	1.89763	0	0	0.477121	0	0	0	0
A21	0	0	0	0	0	0	0	0.477121	0	0	0	0	0	0	0	0	0	0	0	0	0	0	0	0	0	0	0	0	0
A22	0	0.69897	0	0	0	0	0	0.778151	0	0	0	0	0.30103	0	0	0	0	0	0	1.11394	0	0.30103	0	0	0	0	0	0	0
A23	0	0	0	0	0	0	0	0.30103	0	0	0	0	0	0	0	0	0	0	0	0	0	0.30103	0	0	0	0	0	0	0
A24	0	0.30103	0	0	0	0	0	1.11394	0	0	0	0	0	0	0	0	0.477121	0	0	0	0	0	0	0	0	0.30103	0	0	0
A25	0	0	0	0	0	0	0	0	0	0	0	0	0.69897	0	0	0	0.90309	0	0	0	0	0	0	0	0	0.30103	0	0	0
A26	0	0	0	0	0	0	0	0	0	0	0	0	0	0	0	0	0	0	0	0	0	0.778151	0	0	0.30103	0	0	0	0
A28	0	1.716	0	0	0	0	0	0	0	0	0	0	0	0	0	0	0	0	0	1.11394	0	0.477121	0	0	0	0	0	0	0
A29	0	0.477121	0	0	0	0	0	0	0	0	0	0	0.30103	0	0	0	0.845098	0	0	1	0	0	0	0	0	0	0	0	0
A30	0	0.954243	0	0	0.477121	0	0	0.954243	0	0	0	0	0.778151	0	0	0	1.63347	0	0	0.30103	0.30103	0	0	0	0	0.477121	0	0	0
A31	0	1.07918	0	0	0	0	0	0.845098	0	0	0	0	1.11394	0	0	0	1.20412	0	0	0.30103	0	0.778151	0	0	0.69897	0.69897	0	0.30103	0
A32	0	0	0	0	0	0	0	0	0	0	0	0	0.69897	0	0	0	0	0	0	0	0	1.11394	0	0	0	0.30103	0	0	0
A33	0	0	0	0	0	0	0	0.30103	0	0	0	0	0	0	0	0	0	0	0	0	0	1.78533	0	0	0	0	0	0	0
A35	0	0	0	0	0	0	0	2.00432	0	0	0	0	0	0	0	0	0	0	0	0	0	0	0	0	0	0	0	0	0
A36	0	0	0	0	0	0	0	1.34242	0	0	0	0	0	0	0	0	0	0	0	0	0	0	0	0	0	0	0	0	0
A37	0	0	0	0	0	0	0	2.13988	0	0	0	0	0	0	0	0	0	0	0	0	0	0	0	0	0	0	0	0	0
A38	0	0	0	0	0	0	0	1.44716	0	0	0	0	0	0	0	0	0	0	0	0	0	0	0	0	0	0	0	0	0
A39	0	0	0	0	0	0	0	0.90309	0	0	0	0	0	0	0	0	0	0	0	1.44716	0	0	0	0	0	0	0	0	0
A40	0	1.23045	0	0	0	0	0	1.63347	0	0	0	0	0.778151	0	0	0	0	0	0	0	0	0	0	0	0	0	0	0	0
B1	0	0	0	0	0	0.477121	0	0	0	0	0	0	0	0	0	0.477121	0	0	0	0	0	0	0	0	1.17609	0	0	0	0
B2	0	0	0	0	0	0	0	0	0	0	0	0	0	0	0	0.477121	0	0	0	0	0	0	0	0	0	0	0	0	0
B3	0	0	0	0	0	0.30103	0	0	0	0.30103	0	0	0.30103	0.60206	0	0.477121	0	0	0	0	0	1.20412	0	0	0	0	0	0	0
B5	0	1.04139	0	0	0	0	0	0	0	0	0	0	0.954243	0	0	0.30103	0	0	0	0	0	1.99564	0	0.477121	0	0	0	0	0
B6	0	0.477121	0	0	0	0	0	0	0	0	0	0.30103	0.778151	0	0	0	0	0	0	0	0	0.477121	0	0	0.30103	0.60206	0	0	0
B7	0	0	0	0	0	0	0	0	0	0	0	0	0.778151	0	0	0.477121	0	0	0	0	0.30103	2.14301	0	0	0.69897	0	0	0	0
B9	0	0.477121	1.96848	0	0	0	0	1.14613	0	0	0	0	0.778151	0	0	0	0	0	0	0	0	0	0	0	0.30103	0.30103	0	0	0
B10	0	1.30103	0	0	0	0	0	0	0	0	0	0	0	0	0	0	0	0	0	0	0	0.30103	0	0	0.30103	0	0	0	0
B11	0	0.477121	0	0	0	0	0	0	0	0	0	1.11394	0.477121	0	0	0.30103	0	0	0	0	0.30103	0	0	0	0	0	0	0	0
B12	0	0	0	0	0	0	0	0	0	0	0	0	0	0	0	0	0	0	0	0	0	0	0	0	0.30103	0	0	0	0
B13	0	0	0	0	0	0.30103	0	0	0	0	0	0	0	0	0	0	0	0	0	0	0	0.30103	0	0	0	0	0	0	0
B15	0	1.5563	0	0	0	0	0	0	0	0	0	0	0.477121	0	0	0	0	0	0	1.50515	0	1.6721	0	0	0.30103	0	0	0	0
B16	0	0.30103	0	0	0	0	0	0	0	0	0	0	0	0	0	0	0	0	0	0	0	0.60206	0	0	0	0	0	0	0
B17	0	0	0	0	0	0	0	0	0	0	0	0	0	0	0	0.30103	0	0	0	0	0	0	0	0	0	0	0	0	0
B18	0	0	0	0	0	0	0	0	0	0	0	0	0	0	0	0.477121	0	0	0	0	0	0	0	0	0	0	0	0	0
B19	0	0	0	0	0	0	0	0	0	0	0	0	0	0	0	0	0	0	0	0	0	1.59106	0	0	0	0	0	0	0
B21	0	1.61278	0	0	0	0	0	1.36173	0	0	0	0	0	0	1.68124	0.845098	0	0	0	0.60206	0	0	0	0	0	0	0	0.477121	0
B22	0	1.47712	0	0	0	0	0	0.30103	0	0	0	0	0	0	1.04139	1.47712	0	0	0	0	0	0	0	0	0.477121	0	0	0	0
B23	0	1.44716	0	0	0.60206	0	0	0	0	0	0	0	0	0	0	0.30103	0	0	0	2.16732	0	0	0	0	0	0	0	0	0
B24	0	0.845098	0	0	0	0.30103	0	0	0	0	0	0	0	0	0	0.477121	0	0	0	0.30103	0	1.17609	0	0	1.07918	0	0	0	0
B25	0	0.30103	0	0	0	0	0	0	0	0.845098	0	0	0	0	0	0	0	0	0	0	0.30103	0	0	0	0.60206	0	0	1	0
B26	0	0	0	0	0	0	0	0	0	0	0	0	1.07918	0.30103	0	0	0	0	0	0	0	1.6721	0	0	0	0	0	0	0
B28	0	1.04139	0	0	0	0	0	0	0	0	0	0	1.07918	0	0	0.30103	0	0	0	1.6721	0	0	0	0	0	0	0	0	0
B29	0	0	0	0	0	0	0	0	0	0	0	0	0	0	0	2.33445	0.778151	0	0	2.83696	0	0.69897	0	0	0.30103	0	0	0	0
B30	0	1.44716	0	0	0	0	0	0	0	0.90309	0	0	0	0	0	0.30103	0	0	0	1.60206	0	2.29226	0	0	0	0.30103	0	0	0
B31	0	0	0	0	0	0	0	0	0	0.69897	0	0	0	0	0.30103	0	0	0	0.30103	0	0.30103	0.69897	0	0	0	0	0	0.778151	0
B32	0	0.30103	0	0	0	0	0	0	0	0	0	0.30103	0	0	0	0	0	0	0	0	0	0	0	0	0	0	0	0.477121	0
B33	0	0	0	0	0	0	0	0	0	0	0	0	0	0	0	0	0	0	0.30103	0	0.30103	0	0	0	0.30103	0	0	0	0
B35	0	0	0	0	0	0	0	3.07078	0	0	0	0	0	0	0.30103	0	0	0	0	0	0	0	0	0	0	0	0	0	0
B36	0	0	0	0	0	0	0	3.48144	0	0	0.778151	0	0	0	0	0	0	0	0	0	0	0	0	0.30103	0	0	0	0	0
B37	0	0	0	0	0	0	0	3.14145	0	0	0	0	0	0	0	0	0	0	0	0	0	0	0	0	0	0	0	0	0
B38	0	0	0	0	0	0	0	2.82086	0	0	0.778151	0.30103	0	0	0	0	0	0	0	0	0	0	0	0.477121	0	0	0	0	0
B39	0	0	0	0	0	0	0	1.30103	0	0	0	0	0	0	0	0	0	0	0	0	0	0	0	0	0	0	0.477121	0	0
B40	0	0.30103	0	0	0	0	0	1.6902	0	0	0.30103	0	0	0	0	0.30103	0	0	0	0	0	0	0	0	1.43136	0	0	0	0
C2	0	0	0	0	0	0	0	0	0	0	0	0.30103	0	0	0	0	0	0.30103	0	0	0	0	0	0	0	0	0	0	0
C3	0	0	0	0	0	0	0	0.30103	0	0	0	0	0	0	0	0	0	0	0	0	0	0	0	0	0	0	0	0	0
C5	0	0.30103	0	0	0	0	0	0	0	0	0	0	0	0	0	0	0	0	0	0	0	0.60206	0	0	0	0	0	0	0
C8	0	0	0	0	0	0	0	0	0	0	0	0	0	0	0	0	0	0	0	0	0	0	0	0	0.30103	0	0	0	0
C9	0	1.11394	0	0	0	0	0	0	0	0	0	0	0	0	0	0	0	0	0	0	0	0.477121	0	0	0	0	0	0	0
C10	0	0	0	0	0	0	0	0	0	0	0	0	0	0	0	0	0	0	0	0	0	0.845098	0	0	0	0	0	0	0
C11	0	0	0	0	0	0	0	0	0	0	0	0	0	0	0	0	0	0	0	0	0	0	0	0	0	0	0.30103	0	0
C12	0	0	0	0	0	0	0	1.20412	0.30103	0	0	0	0	0	0	0	0.477121	0	0	0	0	0	0	0	0	0	0	0	0
C13	0	0.30103	0	0	0	0	0	0	0	0	0	0.30103	0	0	0	0	0	0	0	0	0	1.32222	0	0	0	0	0	0	0
C14	0	0	0	0	0	0	0	0.30103	0	0	0	0	0	0	0	0	0	0	0	0	0	0	0	0	0	0	0	0	0
C20	0	0	0	0	0	0	0	0.30103	0	0	0	0	0	0	0	0	0	0	0	0	0	0	0	0	0	0	0	0	0
C21	0	0	0	0	0	0	0	0.477121	0.30103	0	0	0	0	0	0	0	0	0	0	0.778151	0	0.30103	0	0	0	0	0	0	0
C22	0	0	0	0	0	0	0	0	0	0	0	0	0.30103	0	0	0	0	0	0	1.23045	0	0	0	0	0	0	0	0	0
C23	0	0.477121	0	0	0	0	0	0	0	0	0	0	0	0	0	0	0	0	0	0.30103	0	0	0	0	0	0	0	0	0
C25	0	0.30103	0	0	0	0	0	0	0	0	0	0.30103	0	0	0	0	0	0	0	0	0	0	0	0	0	0	0	0	0
C27	0	0.30103	0	0	0	0	0	0	0	0	0	0	0	0	0	0	0	0	0	0	0	0.30103	0	0	0	0	0	0	0
C28	0	0.90309	0	0	0	0	0	0	0.30103	0	0	0	0	0	0	0	0	0	0	1.30103	0	0	0	0	0	0	0	0	0
C29	0	1.04139	0	0	0	0	0	0	0	0	0	0	0.30103	0	0	0	0	0	0	1.716	0	0	0	0	0	0	0	0	0
C30	0	1.79239	0	0	0	0	0	0.477121	0	0	0	0.69897	0	0	0	0.30103	0	0	0	0	0	0	0.477121	0	0	0	0	0	0
C31	0	0	0	0	0	0	0	0	0	0	0	0.60206	0.60206	0	0	0	0	0.30103	0	0	0	0.30103	0	0	0	0	0	0	0
C32	0	0.60206	0	0	0	0	0	0.477121	0	0	0	0	0	0	0	0	0	0	0	0	0	0	0	0	0	0	0	0	0
C35	0	0	0	0	0	0	0	1.72428	0	0	0	0	0	0	0	0	0	0	0	0	0	0	0	0	0	0	0.30103	0	0
C36	0	0	0	0	0	0	0	1.11394	0	0	0	0	0	0	0	0	0	0	0	0	0	0	0	0	0	0	0	0	0
C40	0	0	0	0	0	0	0	0	0	0	0	0	0	0	0	0	0	0	0	0	0	0.845098	0	0	0	0	0	0	0
D2	0	0	0	0	0	0	0	0	0	0	0	0	0.30103	0	0	0	0	0	0	0	0	0.477121	0	0	0	0	0	0	0
D3	0	0	0	0	0	0	0	0	0	0	0	0	0	0	0	0	0	0	0	0	0	0.69897	0	0	0	0	0	0	0
D6	0	0	0	0	0	0	0	0	0	0	0	0	0	0	0	0	0	0	0	0	0	0	0	0	0.477121	0	0	0	0
D10	0	0	0	0	0	0	0	0	0	0	0	0	0	0	0	0	0	0	0	0	0	0.30103	0	0	0	0	0	0	0
D11	0	0	0	0	0	0	0	0	0	0	0	0	0	0	0	0	0	0	0	0	0	1.07918	0	0	0	0	0	0	0
D16	0	0.60206	0	0	0.30103	0	0	0	0	0	0	0	0	0	0	0	0	0	0	0.30103	0	0.30103	0	0	0	0.30103	0	0	0
D17	0	0.778151	0	0	0	0	0	0	0	0	0	0	0	0	0	0	0	0	0	0.30103	0	0	0	0	0	0	0	0	0
D18	0	0.30103	0	0	0	0	0	0	0	0	0	0	0	0	0	0	0	0	0	0.30103	0	0	0	0	0	0	0	0	0
D20	0	0	0	0	0	0	0	0.30103	0	0	0	0	0	0	0	0	0	0	0	0	0	0	0	0	0	0	0	0	0
D21	0	0	0	0	0	0	0	0.69897	0	0	0	0.30103	0	0	0	0	0	0	0	0	0	0	0	0	0	0	0	0	0
D22	0	0	0	0	0	0	0	0.954243	0	0	0	0	0	0	0	0	0	0	0	0	0	0	0	0.30103	0	0	0	0	0
D23	0	1.9345	0	0	0	0	0	0	0	0	0	0.60206	0	0	0	0	0	0	0	2.06819	0	0.60206	0.30103	0	0	0.30103	0	0	0
D25	0	0	0	0	0	0	0	0	0	0	0	0	0	0	0	0	0	0	0	0	0	1	0	0	0	0	0	0	0
D26	0	0.30103	0	0	0	0	0	0	0	0	0	0	0	0	0	0	0	0	0	0	0	0	0	0	0	0	0	0	0
D28	0	0	0	0	0	0	0	0	0	0	0	0	0	0	0	0	0	0	0	0	0	0	0	0	0	0	0	0	0.30103
D29	0	1.66276	0	0	0	0	0	0	0	0	0	0	0	0	0	0	0	0	0	0	0	0	0	0	0	0	0	0	0
D30	0	1.8451	0	0	0	0	0	0	0	0	0	0	0	0	0	0	0	0	0	0	0	0	0	0	0	0	0	0	0
D31	0	0	0.30103	0	0.30103	0	0	0	0	0	0	0	0	0	0	0	0	0	0	0	0	0.69897	0	0	0	0	0	0	0.30103
D32	0	0.477121	0	0	0	0	0	0	0	0	0	0	0	0	0	0	0	0	0	0	0	0.30103	0	0	0.30103	0	0	0	0
D33	0	0.30103	0	0	0	0	0	1.07918	0	0	0	0	0	0	0	0	0	0	0	0	0	0	0	0	0	0	0	0	0
D34	0	0.778151	0	0	0	0	0	0	0	0	0	0	0	0	0	0	0.30103	0	0	0	0	0	0	0	0	0	0	0	0
D35	0	0	0	0	0	0	0	2.09691	0	0	0	0	0	0	0	0	0	0	0	0	0	0	0	0	0	0	0	0	0
D36	0	0	0	0	0	0	0	1.74819	0	0	0	0	0	0	0	0	0	0	0	0	0	0	0	0	0	0	0	0	0
D38	0	0	0	0	0	0	0	1.32222	0	0	0	0	0	0	0	0	0	0	0	0	0	0	0	0	0	0	0	0	0
D39	0	0	0	0	0	0	0	0.30103	0	0	0	0	0	0	0	0	0	0	0	0	0	0	0	0	0	0	0	0	0
E6	0	0	0	0	0	0	0	0	0	0	0	0	0	0	0	0	0	0	0	0	0	0.69897	0	0	0	0.954243	0	0	0
E7	0	0.477121	0	0	0	0	0	0	0	0	0	0	0	0	0	0	0	0	0	0	0	0	0	0	0	0	0	0	0
E10	0.30103	0	0	0	0	0	0	0	0	0	0	0	0	0	0	0	0	0	0.30103	0.30103	0	0.477121	0	0.30103	0.30103	0	0	0	0
E11	0	0.30103	0.30103	0	0	0	0.60206	0	0	0	0	0	0	0	0	0	0	0	0	0	0	0.30103	0	0.30103	0	0	0	0	0
E15	1.5682	0.69897	0.30103	0	0	0	0.778151	0	0	0	0	0	0	0	0	0	0	0	0	1.17609	0	0	0	0	0	0	0	0	0
E16	0	0	0	0	0	0	0	0	0	0	0	0	0	0	0	0	0	0	0	0	0	1.30103	0	0	0	0	0	0	0
E17	1.04139	0	0	0	0	0	0	0	0	0	0	0	0	0	0	0.30103	0	0	0	0	0	1.79239	0	0	0	1.23045	0	0	0
E20	0	0	0	0	0	0	0	0	0	0	0	0	0	0	0	0	0	0	0	0	0	0.778151	0	0	0	0	0	0	0
E22	0	0	0	0	0.30103	0	0	0	0	0	0	0	0	0	0	0	0	0	0	1.30103	0	0	0	1.80618	0.477121	0	0	0	0
E23	1.07918	0	0	0	0	0	0	0	0	0	0	0	0	0	0	0	0	0	0.60206	1.34242	0	0	0	1.07918	1.34242	0	0	0	0
E27	0	0	0	0	0	0	0	0	0	0	0	0	0	0	0	0	0	0	0	0	0	0.477121	0	0	0	0	0	0	0
E28	0	0.778151	0	0	0	0	0	0	0	0	0	0	0	0	0	0	0	0	0	0.30103	0	0	0	0	0	0	0	0	0
E29	0	0.477121	0	0	0	0	0	0	0	0	0	0	0	0	0	0	0	0	0	0.30103	0	0	0	0.477121	0	0	0	0	0
E30	0	0.60206	0	0	0	0	0	0	0	0	0	0	0	0	0	0	0	0	0	0	0	0	0	0	0	0	0	0	0
E33	0	0.30103	0	0	0	0	0	0	0	0	0	0	0	0	0	0	0	0	0	0	0	1.14613	0	0	0	0	0	0	0
E34	0	0.30103	0	0	0	0	0	0	0	0	0	0	0	0	0	0	0	0	0	0	0	0	0	0	0	0	0	0	0
E35	0	0	0	0	0	0	0	2.41996	0	0	0	0	0	0	0	0	0	0	0	0	0	0	0	0	0	0	0	0	0
E36	0	0	0	0	0	0	0	1	0	0	0	0	0	0	0	0	0	0	0	0	0	0	0	0	0	0	0	0	0
E37	0	0	0	0	0	0	0	1.90849	0	0	0	0	0	0	0	0	0	0	0	0	0	0	0	0	0	0	0	0	0

## Sheet: LOG转化去稀有种无2009
0	白氏银汉鱼	鲷科	东方鲀属	短吻三线舌鳎	凤鲚	褐菖鲉	黄鲫	寡鳞飘鱼	康氏小公鱼	六丝矛尾鰕虎鱼	鳗鲡科	矛尾复鰕虎鱼	矛尾鰕虎鱼	舌鳎属	七星底灯鱼	前颌间银鱼	松江鲈	鲐	鳀	鰕虎鱼科	细条天竺鲷	小黄鱼	银鲳	银飘鱼	有明银鱼	鲬
	Able	SPar	Tfug	Cabb	Cmys	Smar	Stat	Peng	Acom	Chex	Angu	Shas	Csti	Cyno	Bpte	Hpro	Tfas	Pjap	Ejap	Gobi	Clin	Ppol	Parg	Psin	SCri	Pind
A2	2.03743	0	0	0	0	0.90309	0	0	0	2.26007	0	0	0	0	0	0	0	0	1.63347	0	0.60206	0	0	0	0	0
A5	0	0	0.60206	0	0	0.60206	0	0	0	0.778151	0	0	0	0.69897	0	0	0	0	0.30103	0	0.69897	0.845098	0	0.30103	0	0.30103
A6	0	0	0	0	0	0	0	0	0	1	0	0	0	0	0	0	0	0	1.32222	0	0.954243	0.30103	0	0.30103	0	0.30103
A7	0	0	0	0	0	0	0	0	0	2.08991	0	0	0	0	0	0	0	0	3.01284	0	0.60206	0.30103	0	0	0	0
A9	1.6721	0	0.845098	0	0	0	0	0	0	0.30103	0	0	0	0	0	0	0	0	0	0	0	0.477121	0	0	0	0
A10	0.90309	0	0	0	0	0.778151	0	0	0	0.60206	0	0	0	0	0	0	0	0	0.30103	0	0.30103	0	0	0.30103	0	0.30103
A11	0.60206	0	0	0	0	0	0	0	0	0.60206	0	0	0	0.477121	0	0	0	0	0	0	0	0.477121	0	0	0	0
A12	0.30103	0	0	0	0	0	0	0	0	0	0	0	0	0	1.90309	0	0	0.30103	0.778151	0	0	0	0	0	0	0
A13	0	0	0	0	0	2.11394	0	0	0	0	0	0	0	0	0	0	0	0.30103	1.04139	0	0	0.477121	0	0	0	0
A15	1.36173	0	0	0	0	0.60206	0	0	0	0.30103	0	0	0	0	0	0	0	0	0.30103	0	0	0	0	0	0	0
A16	0.477121	0	0	0	0	0	0	0	0	0	0	0	0	0	0	0	0	0	0	0	0	0	0	0	0	0
A17	0	0	0	0	0	0	0	0	0	0.477121	0	0	0	0.90309	0	0	0.30103	0	0	0	0	0	0	0	0	0
A18	0	0	0	0	0	0	0	0	0	0	0	0	0	0	0	0	0	0	0.90309	0	0	0	0	0	0	0
A19	0	0	0	0	0	0.30103	0	0	0	0	0	0	0	0	0	0	0	0	1.89763	0	0.477121	0	0	0	0	0
A21	0	0	0	0	0	0.477121	0	0	0	0	0	0	0	0	0	0	0	0	0	0	0	0	0	0	0	0
A22	0.69897	0	0	0	0	0.778151	0	0	0	0.30103	0	0	0	0	0	0	1.11394	0	0.30103	0	0	0	0	0	0	0
A23	0	0	0	0	0	0.30103	0	0	0	0	0	0	0	0	0	0	0	0	0.30103	0	0	0	0	0	0	0
A24	0.30103	0	0	0	0	1.11394	0	0	0	0	0	0	0	0.477121	0	0	0	0	0	0	0	0.30103	0	0	0	0
A25	0	0	0	0	0	0	0	0	0	0.69897	0	0	0	0.90309	0	0	0	0	0	0	0	0.30103	0	0	0	0
A26	0	0	0	0	0	0	0	0	0	0	0	0	0	0	0	0	0	0	0.778151	0	0.30103	0	0	0	0	0
A28	1.716	0	0	0	0	0	0	0	0	0	0	0	0	0	0	0	1.11394	0	0.477121	0	0	0	0	0	0	0
A29	0.477121	0	0	0	0	0	0	0	0	0.30103	0	0	0	0.845098	0	0	1	0	0	0	0	0	0	0	0	0
A30	0.954243	0	0	0.477121	0	0.954243	0	0	0	0.778151	0	0	0	1.63347	0	0	0.30103	0.30103	0	0	0	0.477121	0	0	0	0
A31	1.07918	0	0	0	0	0.845098	0	0	0	1.11394	0	0	0	1.20412	0	0	0.30103	0	0.778151	0	0.69897	0.69897	0	0.30103	0	0.30103
A32	0	0	0	0	0	0	0	0	0	0.69897	0	0	0	0	0	0	0	0	1.11394	0	0	0.30103	0	0	0	0
A33	0	0	0	0	0	0.30103	0	0	0	0	0	0	0	0	0	0	0	0	1.78533	0	0	0	0	0	0	0
A35	0	0	0	0	0	2.00432	0	0	0	0	0	0	0	0	0	0	0	0	0	0	0	0	0	0	0	0
A36	0	0	0	0	0	1.34242	0	0	0	0	0	0	0	0	0	0	0	0	0	0	0	0	0	0	0	0
A37	0	0	0	0	0	2.13988	0	0	0	0	0	0	0	0	0	0	0	0	0	0	0	0	0	0	0	0
A38	0	0	0	0	0	1.44716	0	0	0	0	0	0	0	0	0	0	0	0	0	0	0	0	0	0	0	0
A39	0	0	0	0	0	0.90309	0	0	0	0	0	0	0	0	0	0	1.44716	0	0	0	0	0	0	0	0	0
A40	1.23045	0	0	0	0	1.63347	0	0	0	0.778151	0	0	0	0	0	0	0	0	0	0	0	0	0	0	0	0
B1	0	0	0	0	0.477121	0	0	0	0	0	0	0	0.477121	0	0	0	0	0	0	0	1.17609	0	0	0	0	0
B2	0	0	0	0	0	0	0	0	0	0	0	0	0.477121	0	0	0	0	0	0	0	0	0	0	0	0	0
B3	0	0	0	0	0.30103	0	0.30103	0	0	0.30103	0.60206	0	0.477121	0	0	0	0	0	1.20412	0	0	0	0	0	0	0
B5	1.04139	0	0	0	0	0	0	0	0	0.954243	0	0	0.30103	0	0	0	0	0	1.99564	0.477121	0	0	0	0	0	0
B6	0.477121	0	0	0	0	0	0	0	0.30103	0.778151	0	0	0	0	0	0	0	0	0.477121	0	0.30103	0.60206	0	0	0	0
B7	0	0	0	0	0	0	0	0	0	0.778151	0	0	0.477121	0	0	0	0	0.30103	2.14301	0	0.69897	0	0	0	0	0
B9	0.477121	1.96848	0	0	0	1.14613	0	0	0	0.778151	0	0	0	0	0	0	0	0	0	0	0.30103	0.30103	0	0	0	0
B10	1.30103	0	0	0	0	0	0	0	0	0	0	0	0	0	0	0	0	0	0.30103	0	0.30103	0	0	0	0	0
B11	0.477121	0	0	0	0	0	0	0	1.11394	0.477121	0	0	0.30103	0	0	0	0	0.30103	0	0	0	0	0	0	0	0
B12	0	0	0	0	0	0	0	0	0	0	0	0	0	0	0	0	0	0	0	0	0.30103	0	0	0	0	0
B13	0	0	0	0	0.30103	0	0	0	0	0	0	0	0	0	0	0	0	0	0.30103	0	0	0	0	0	0	0
B15	1.5563	0	0	0	0	0	0	0	0	0.477121	0	0	0	0	0	0	1.50515	0	1.6721	0	0.30103	0	0	0	0	0
B16	0.30103	0	0	0	0	0	0	0	0	0	0	0	0	0	0	0	0	0	0.60206	0	0	0	0	0	0	0
B17	0	0	0	0	0	0	0	0	0	0	0	0	0.30103	0	0	0	0	0	0	0	0	0	0	0	0	0
B18	0	0	0	0	0	0	0	0	0	0	0	0	0.477121	0	0	0	0	0	0	0	0	0	0	0	0	0
B19	0	0	0	0	0	0	0	0	0	0	0	0	0	0	0	0	0	0	1.59106	0	0	0	0	0	0	0
B21	1.61278	0	0	0	0	1.36173	0	0	0	0	0	0.428336	0.845098	0	0	0	0.60206	0	0	0	0	0	0	0.477121	0	0.477121
B22	1.47712	0	0	0	0	0.30103	0	0	0	0	0	0.309927	1.47712	0	0	0	0	0	0	0	0.477121	0	0	0	0	0
B23	1.44716	0	0	0.60206	0	0	0	0	0	0	0	0	0.30103	0	0	0	2.16732	0	0	0	0	0	0	0	0	0
B24	0.845098	0	0	0	0.30103	0	0	0	0	0	0	0	0.477121	0	0	0	0.30103	0	1.17609	0	1.07918	0	0	0	0	0
B25	0.30103	0	0	0	0	0	0.845098	0	0	0	0	0	0	0	0	0	0	0.30103	0	0	0.60206	0	0	1	0	1
B26	0	0	0	0	0	0	0	0	0	1.07918	0.30103	0	0	0	0	0	0	0	1.6721	0	0	0	0	0	0	0
B28	1.04139	0	0	0	0	0	0	0	0	1.07918	0	0	0.30103	0	0	0	1.6721	0	0	0	0	0	0	0	0	0
B29	0	0	0	0	0	0	0	0	0	0	0	0	2.33445	0.778151	0	0	2.83696	0	0.69897	0	0.30103	0	0	0	0	0
B30	1.44716	0	0	0	0	0	0.90309	0	0	0	0	0	0.30103	0	0	0	1.60206	0	2.29226	0	0	0.30103	0	0	0	0
B31	0	0	0	0	0	0	0.69897	0	0	0	0	0.114287	0	0	0	0.30103	0	0.30103	0.69897	0	0	0	0	0.778151	0	0.778151
B32	0.30103	0	0	0	0	0	0	0	0.30103	0	0	0	0	0	0	0	0	0	0	0	0	0	0	0.477121	0	0.477121
B33	0	0	0	0	0	0	0	0	0	0	0	0	0	0	0	0.30103	0	0.30103	0	0	0.30103	0	0	0	0	0
B35	0	0	0	0	0	3.07078	0	0	0	0	0	0.114287	0	0	0	0	0	0	0	0	0	0	0	0	0	0
B36	0	0	0	0	0	3.48144	0	0.778151	0	0	0	0	0	0	0	0	0	0	0	0.30103	0	0	0	0	0	0
B37	0	0	0	0	0	3.14145	0	0	0	0	0	0	0	0	0	0	0	0	0	0	0	0	0	0	0	0
B38	0	0	0	0	0	2.82086	0	0.778151	0.30103	0	0	0	0	0	0	0	0	0	0	0.477121	0	0	0	0	0	0
B39	0	0	0	0	0	1.30103	0	0	0	0	0	0	0	0	0	0	0	0	0	0	0	0	0.477121	0	0	0
B40	0.30103	0	0	0	0	1.6902	0	0.30103	0	0	0	0	0.30103	0	0	0	0	0	0	0	1.43136	0	0	0	0	0
C2	0	0	0	0	0	0	0	0	0.30103	0	0	0	0	0	0	0.30103	0	0	0	0	0	0	0	0	0	0	0.60206
C3	0	0	0	0	0.30103	0	0	0	0	0	0	0	0	0	0	0	0	0	0	0	0	0	0	0	0	0	0.30103
C5	0.30103	0	0	0	0	0	0	0	0	0	0	0	0	0	0	0	0	0	0.60206	0	0	0	0	0	0	0	0.90309
C8	0	0	0	0	0	0	0	0	0	0	0	0	0	0	0	0	0	0	0	0	0	0.30103	0	0	0	0	0.30103
C9	1.11394	0	0	0	0	0	0	0	0	0	0	0	0	0	0	0	0	0	0.477121	0	0	0	0	0	0	0	1.59106
C10	0	0	0	0	0	0	0	0	0	0	0	0	0	0	0	0	0	0	0.845098	0	0	0	0	0	0	0	0.845098
C11	0	0	0	0	0	0	0	0	0	0	0	0	0	0	0	0	0	0	0	0	0	0	0	0.30103	0	0	0.30103
C12	0	0	0	0	1.20412	0	0	0.30103	0	0	0	0	0	0	0.477121	0	0	0	0	0	0	0	0	0	0	0	1.98227
C13	0.30103	0	0	0	0	0	0	0	0.30103	0	0	0	0	0	0	0	0	0	1.32222	0	0	0	0	0	0	0	1.92428
C14	0	0	0	0	0.30103	0	0	0	0	0	0	0	0	0	0	0	0	0	0	0	0	0	0	0	0	0	0.30103
C20	0	0	0	0	0.30103	0	0	0	0	0	0	0	0	0	0	0	0	0	0	0	0	0	0	0	0	0	0.30103
C21	0	0	0	0	0.477121	0	0	0.30103	0	0	0	0	0	0	0	0	0.778151	0	0.30103	0	0	0	0	0	0	0	1.85733
C22	0	0	0	0	0	0	0	0	0	0.30103	0	0	0	0	0	0	1.23045	0	0	0	0	0	0	0	0	0	1.53148
C23	0.477121	0	0	0	0	0	0	0	0	0	0	0	0	0	0	0	0.30103	0	0	0	0	0	0	0	0	0	0.778151
C25	0.30103	0	0	0	0	0	0	0	0.30103	0	0	0	0	0	0	0	0	0	0	0	0	0	0	0	0	0	0.60206
C27	0.30103	0	0	0	0	0	0	0	0	0	0	0	0	0	0	0	0	0	0.30103	0	0	0	0	0	0	0	0.60206
C28	0.90309	0	0	0	0	0	0	0.30103	0	0	0	0	0	0	0	0	1.30103	0	0	0	0	0	0	0	0	0	2.50515
C29	1.04139	0	0	0	0	0	0	0	0	0.30103	0	0	0	0	0	0	1.716	0	0	0	0	0	0	0	0	0	3.05843
C30	1.79239	0	0	0	0.477121	0	0	0	0.69897	0	0	0	0	0	0	0	0	0	0	0	0.477121	0	0	0	0	0	3.4456
C31	0	0	0	0	0	0	0	0	0.60206	0.60206	0	0	0	0	0	0.30103	0	0	0.30103	0	0	0	0	0	0	0	1.80618
C32	0.60206	0	0	0	0.477121	0	0	0	0	0	0	0	0	0	0	0	0	0	0	0	0	0	0	0	0	0	1.07918
C35	0	0	0	0	1.72428	0	0	0	0	0	0	0	0	0	0	0	0	0	0	0	0	0	0	0.30103	0	0	2.02531
C36	0	0	0	0	1.11394	0	0	0	0	0	0	0	0	0	0	0	0	0	0	0	0	0	0	0	0	0	1.11394
C40	0	0	0	0	0	0	0	0	0	0	0	0	0	0	0	0	0	0	0.845098	0	0	0	0	0	0	0	0.845098
D2	0	0	0	0	0	0	0	0	0	0.30103	0	0	0	0	0	0	0	0	0.477121	0	0	0	0	0	0	0	0.778151
D3	0	0	0	0	0	0	0	0	0	0	0	0	0	0	0	0	0	0	0.69897	0	0	0	0	0	0	0	0.69897
D6	0	0	0	0	0	0	0	0	0	0	0	0	0	0	0	0	0	0	0	0	0	0.477121	0	0	0	0	0.477121
D10	0	0	0	0	0	0	0	0	0	0	0	0	0	0	0	0	0	0	0.30103	0	0	0	0	0	0	0	0.30103
D11	0	0	0	0	0	0	0	0	0	0	0	0	0	0	0	0	0	0	1.07918	0	0	0	0	0	0	0	1.07918
D16	0.60206	0	0.30103	0	0	0	0	0	0	0	0	0	0	0	0	0	0.30103	0	0.30103	0	0	0	0.30103	0	0	0	1.80618
D17	0.778151	0	0	0	0	0	0	0	0	0	0	0	0	0	0	0	0.30103	0	0	0	0	0	0	0	0	0	1.07918
D18	0.30103	0	0	0	0	0	0	0	0	0	0	0	0	0	0	0	0.30103	0	0	0	0	0	0	0	0	0	0.60206
D20	0	0	0	0	0.30103	0	0	0	0	0	0	0	0	0	0	0	0	0	0	0	0	0	0	0	0	0	0.30103
D21	0	0	0	0	0.69897	0	0	0	0.30103	0	0	0	0	0	0	0	0	0	0	0	0	0	0	0	0	0	1
D22	0	0	0	0	0.954243	0	0	0	0	0	0	0	0	0	0	0	0	0	0	0	0	0	0	0	0	0	0.954243
D23	1.9345	0	0	0	0	0	0	0	0.60206	0	0	0	0	0	0	0	2.06819	0	0.60206	0	0.30103	0	0.30103	0	0	0	5.80886
D25	0	0	0	0	0	0	0	0	0	0	0	0	0	0	0	0	0	0	1	0	0	0	0	0	0	0	1
D26	0.30103	0	0	0	0	0	0	0	0	0	0	0	0	0	0	0	0	0	0	0	0	0	0	0	0	0	0.30103
D28	0	0	0	0	0	0	0	0	0	0	0	0	0	0	0	0	0	0	0	0	0	0	0	0	0.30103	0	0.30103
D29	1.66276	0	0	0	0	0	0	0	0	0	0	0	0	0	0	0	0	0	0	0	0	0	0	0	0	0	1.66276
D30	1.8451	0	0	0	0	0	0	0	0	0	0	0	0	0	0	0	0	0	0	0	0	0	0	0	0	0	1.8451
D31	0	0	0.30103	0	0	0	0	0	0	0	0	0	0	0	0	0	0	0	0.69897	0	0	0	0	0	0.30103	0	1.30103
D32	0.477121	0	0	0	0	0	0	0	0	0	0	0	0	0	0	0	0	0	0.30103	0	0	0.30103	0	0	0	0	1.07918
D33	0.30103	0	0	0	1.07918	0	0	0	0	0	0	0	0	0	0	0	0	0	0	0	0	0	0	0	0	0	1.38021
D34	0.778151	0	0	0	0	0	0	0	0	0	0	0	0	0	0.30103	0	0	0	0	0	0	0	0	0	0	0	1.07918
D35	0	0	0	0	2.09691	0	0	0	0	0	0	0	0	0	0	0	0	0	0	0	0	0	0	0	0	0	2.09691
D36	0	0	0	0	1.74819	0	0	0	0	0	0	0	0	0	0	0	0	0	0	0	0	0	0	0	0	0	1.74819
D38	0	0	0	0	1.32222	0	0	0	0	0	0	0	0	0	0	0	0	0	0	0	0	0	0	0	0	0	1.32222
D39	0	0	0	0	0.30103	0	0	0	0	0	0	0	0	0	0	0	0	0	0	0	0	0	0	0	0	0	0.30103
	44.3315	1.96848	2.04922	1.07918	16.2588	37.8559	2.74819	2.76042	5.12424	21.2892	0.90309	0.966837	9.62661	7.92023	2.68124	1.20412	24.5627	2.40824	44.3063	1.25527	12.9856	7.241	1.07918	4.53857	0.60206	3.93651

## Sheet: LOG转化去稀有种04.07
	白氏银汉鱼	东方鲀属	凤鲚	寡鳞飘鱼	康氏小公鱼	六丝矛尾鰕虎鱼	七星底灯鱼	前颌间银鱼	松江鲈	鳀鱼	细条天竺鲷	小黄鱼	银鲳	银飘鱼	有明银鱼
	CDle	Tfug	Cmys	Peng	Ccom	Chex	Dpte	Hpro	TfCs	EjCp	Clin	Ppol	PCrg	Psin	SCri
C2	0	0	0	0	0.30103	0	0	0.30103	0	0	0	0	0	0	0
C3	0	0	0.30103	0	0	0	0	0	0	0	0	0	0	0	0
C5	0.30103	0	0	0	0	0	0	0	0	0.60206	0	0	0	0	0
C8	0	0	0	0	0	0	0	0	0	0	0	0.30103	0	0	0
C9	1.11394	0	0	0	0	0	0	0	0	0.477121	0	0	0	0	0
C10	0	0	0	0	0	0	0	0	0	0.845098	0	0	0	0	0
C11	0	0	0	0	0	0	0	0	0	0	0	0	0	0.30103	0
C12	0	0	1.20412	0.30103	0	0	0.477121	0	0	0	0	0	0	0	0
C13	0.30103	0	0	0	0.30103	0	0	0	0	1.32222	0	0	0	0	0
C14	0	0	0.30103	0	0	0	0	0	0	0	0	0	0	0	0
C20	0	0	0.30103	0	0	0	0	0	0	0	0	0	0	0	0
C21	0	0	0.477121	0.30103	0	0	0	0	0.778151	0.30103	0	0	0	0	0
C22	0	0	0	0	0	0.30103	0	0	1.23045	0	0	0	0	0	0
C23	0.477121	0	0	0	0	0	0	0	0.30103	0	0	0	0	0	0
C25	0.30103	0	0	0	0.30103	0	0	0	0	0	0	0	0	0	0
C27	0.30103	0	0	0	0	0	0	0	0	0.30103	0	0	0	0	0
C28	0.90309	0	0	0.30103	0	0	0	0	1.30103	0	0	0	0	0	0
C29	1.04139	0	0	0	0	0.30103	0	0	1.716	0	0	0	0	0	0
C30	1.79239	0	0.477121	0	0.69897	0	0	0	0	0	0.477121	0	0	0	0
C31	0	0	0	0	0.60206	0.60206	0	0.30103	0	0.30103	0	0	0	0	0
C32	0.60206	0	0.477121	0	0	0	0	0	0	0	0	0	0	0	0
C35	0	0	1.72428	0	0	0	0	0	0	0	0	0	0	0.30103	0
C36	0	0	1.11394	0	0	0	0	0	0	0	0	0	0	0	0
C40	0	0	0	0	0	0	0	0	0	0.845098	0	0	0	0	0
D2	0	0	0	0	0	0.30103	0	0	0	0.477121	0	0	0	0	0
D3	0	0	0	0	0	0	0	0	0	0.69897	0	0	0	0	0
D6	0	0	0	0	0	0	0	0	0	0	0	0.477121	0	0	0
D10	0	0	0	0	0	0	0	0	0	0.30103	0	0	0	0	0
D11	0	0	0	0	0	0	0	0	0	1.07918	0	0	0	0	0
D16	0.60206	0.30103	0	0	0	0	0	0	0.30103	0.30103	0	0	0.30103	0	0
D17	0.778151	0	0	0	0	0	0	0	0.30103	0	0	0	0	0	0
D18	0.30103	0	0	0	0	0	0	0	0.30103	0	0	0	0	0	0
D20	0	0	0.30103	0	0	0	0	0	0	0	0	0	0	0	0
D21	0	0	0.69897	0	0.30103	0	0	0	0	0	0	0	0	0	0
D22	0	0	0.954243	0	0	0	0	0	0	0	0	0	0	0	0
D23	1.9345	0	0	0	0.60206	0	0	0	2.06819	0.60206	0.30103	0	0.30103	0	0
D25	0	0	0	0	0	0	0	0	0	1	0	0	0	0	0
D26	0.30103	0	0	0	0	0	0	0	0	0	0	0	0	0	0
D28	0	0	0	0	0	0	0	0	0	0	0	0	0	0	0.30103
D29	1.66276	0	0	0	0	0	0	0	0	0	0	0	0	0	0
D30	1.8451	0	0	0	0	0	0	0	0	0	0	0	0	0	0
D31	0	0.30103	0	0	0	0	0	0	0	0.69897	0	0	0	0	0.30103
D32	0.477121	0	0	0	0	0	0	0	0	0.30103	0	0.30103	0	0	0
D33	0.30103	0	1.07918	0	0	0	0	0	0	0	0	0	0	0	0
D34	0.778151	0	0	0	0	0	0.30103	0	0	0	0	0	0	0	0
D35	0	0	2.09691	0	0	0	0	0	0	0	0	0	0	0	0
D36	0	0	1.74819	0	0	0	0	0	0	0	0	0	0	0	0
D38	0	0	1.32222	0	0	0	0	0	0	0	0	0	0	0	0
D39	0	0	0.30103	0	0	0	0	0	0	0	0	0	0	0	0

## Sheet: 去稀有种04.07
	白氏银汉鱼	东方鲀属	凤鲚	寡鳞飘鱼	康氏小公鱼	六丝矛尾鰕虎鱼	七星底灯鱼	前颌间银鱼	松江鲈	鳀鱼	细条天竺鲷	小黄鱼	银鲳	银飘鱼	有明银鱼
	Able	Tfug	Cmys	Peng	Acom	Chex	Bpte	Hpro	Tfas	Ejap	Alin	Ppol	Parg	Psin	Sari
A2	0	0	0	0	1	0	0	1	0	0	0	0	0	0	0
A3	0	0	1	0	0	0	0	0	0	0	0	0	0	0	0
A5	1	0	0	0	0	0	0	0	0	3	0	0	0	0	0
A8	0	0	0	0	0	0	0	0	0	0	0	1	0	0	0
A9	12	0	0	0	0	0	0	0	0	2	0	0	0	0	0
A10	0	0	0	0	0	0	0	0	0	6	0	0	0	0	0
A11	0	0	0	0	0	0	0	0	0	0	0	0	0	1	0
A12	0	0	15	1	0	0	2	0	0	0	0	0	0	0	0
A13	1	0	0	0	1	0	0	0	0	20	0	0	0	0	0
A14	0	0	1	0	0	0	0	0	0	0	0	0	0	0	0
A20	0	0	1	0	0	0	0	0	0	0	0	0	0	0	0
A21	0	0	2	1	0	0	0	0	5	1	0	0	0	0	0
A22	0	0	0	0	0	1	0	0	16	0	0	0	0	0	0
A23	2	0	0	0	0	0	0	0	1	0	0	0	0	0	0
A25	1	0	0	0	1	0	0	0	0	0	0	0	0	0	0
A27	1	0	0	0	0	0	0	0	0	1	0	0	0	0	0
A28	7	0	0	1	0	0	0	0	19	0	0	0	0	0	0
A29	10	0	0	0	0	1	0	0	51	0	0	0	0	0	0
A30	61	0	2	0	4	0	0	0	0	0	2	0	0	0	0
A31	0	0	0	0	3	3	0	1	0	1	0	0	0	0	0
A32	3	0	2	0	0	0	0	0	0	0	0	0	0	0	0
A35	0	0	52	0	0	0	0	0	0	0	0	0	0	1	0
A36	0	0	12	0	0	0	0	0	0	0	0	0	0	0	0
A40	0	0	0	0	0	0	0	0	0	6	0	0	0	0	0
B2	0	0	0	0	0	1	0	0	0	2	0	0	0	0	0
B3	0	0	0	0	0	0	0	0	0	4	0	0	0	0	0
B6	0	0	0	0	0	0	0	0	0	0	0	2	0	0	0
B10	0	0	0	0	0	0	0	0	0	1	0	0	0	0	0
B11	0	0	0	0	0	0	0	0	0	11	0	0	0	0	0
B16	3	1	0	0	0	0	0	0	1	1	0	0	1	0	0
B17	5	0	0	0	0	0	0	0	1	0	0	0	0	0	0
B18	1	0	0	0	0	0	0	0	1	0	0	0	0	0	0
B20	0	0	1	0	0	0	0	0	0	0	0	0	0	0	0
B21	0	0	4	0	1	0	0	0	0	0	0	0	0	0	0
B22	0	0	8	0	0	0	0	0	0	0	0	0	0	0	0
B23	85	0	0	0	3	0	0	0	116	3	1	0	1	0	0
B25	0	0	0	0	0	0	0	0	0	9	0	0	0	0	0
B26	1	0	0	0	0	0	0	0	0	0	0	0	0	0	0
B28	0	0	0	0	0	0	0	0	0	0	0	0	0	0	1
B29	45	0	0	0	0	0	0	0	0	0	0	0	0	0	0
B30	69	0	0	0	0	0	0	0	0	0	0	0	0	0	0
B31	0	1	0	0	0	0	0	0	0	4	0	0	0	0	1
B32	2	0	0	0	0	0	0	0	0	1	0	1	0	0	0
B33	1	0	11	0	0	0	0	0	0	0	0	0	0	0	0
B34	5	0	0	0	0	0	1	0	0	0	0	0	0	0	0
B35	0	0	124	0	0	0	0	0	0	0	0	0	0	0	0
B36	0	0	55	0	0	0	0	0	0	0	0	0	0	0	0
B38	0	0	20	0	0	0	0	0	0	0	0	0	0	0	0
B39	0	0	1	0	0	0	0	0	0	0	0	0	0	0	0

## Sheet: LOG转化去稀有种99.01
	白氏银汉鱼	赤鼻棱鳀	鲷科	东方鲀属	短吻三线舌鳎	凤鲚	褐菖鲉	黄鲫	康氏小公鱼	六丝矛尾鰕虎鱼	鳗鲡科	矛尾复鰕虎鱼	矛尾鰕虎鱼	七星底灯鱼	前颌间银鱼	舌鳎属	松江鲈	鲐	鳀	鰕虎鱼科	小黄鱼	银鲳	银飘鱼	鲬
	Cdla	Tkam	SPCr	Tfug	ECDD	Emys	SmCr	StCt	CEom	EhAx	Cngu	Shas	Esti	DptA	Hpro	Eyno	TfCs	PjCp	AjCp	GoDi	Ppol	PCrg	Psin	PinB
A02	2.03743	0	0	0	0	0.90309	0	0	0	2.26007	0	0	0	0	0	0	0	0	1.63347	0	0.60206	0	0	0
A05	0	0	0.60206	0	0	0.60206	0	0	0	0.778151	0	0	0	0.69897	0	0	0	0	0.30103	0	0.69897	0.845098	0	0.30103
A06	0	0	0	0	0	0	0	0	0	1	0	0	0	0	0	0	0	0	1.32222	0	0.954243	0.30103	0	0.30103
A07	0	0	0	0	0	0	0	0	0	2.08991	0	0	0	0	0	0	0	0	3.01284	0	0.60206	0.30103	0	0
A09	1.6721	0	0.845098	0	0	0	0	0	0	0.30103	0	0	0	0	0	0	0	0	0	0	0	0.477121	0	0
A10	0.90309	0	0	0	0	0.778151	0	0	0	0.60206	0	0	0	0	0	0	0	0	0.30103	0	0.30103	0	0	0.30103
A11	0.60206	0	0	0	0	0	0	0	0	0.60206	0	0	0	0.477121	0	0	0	0	0	0	0	0.477121	0	0
A12	0.30103	0	0	0	0	0	0	0	0	0	0	0	0	0	1.90309	0	0	0.30103	0.778151	0	0	0	0	0
A13	0	0	0	0	0	2.11394	0	0	0	0	0	0	0	0	0	0	0	0.30103	1.04139	0	0	0.477121	0	0
A15	1.36173	0	0	0	0	0.60206	0	0	0	0.30103	0	0	0	0	0	0	0	0	0.30103	0	0	0	0	0
A16	0.477121	0	0	0	0	0	0	0	0	0	0	0	0	0	0	0	0	0	0	0	0	0	0	0
A17	0	0	0	0	0	0	0	0	0	0.477121	0	0	0	0.90309	0	0	0.30103	0	0	0	0	0	0	0
A18	0	0	0	0	0	0	0	0	0	0	0	0	0	0	0	0	0	0	0.90309	0	0	0	0	0
A19	0	0	0	0	0	0.30103	0	0	0	0	0	0	0	0	0	0	0	0	1.89763	0	0.477121	0	0	0
A21	0	0	0	0	0	0.477121	0	0	0	0	0	0	0	0	0	0	0	0	0	0	0	0	0	0
A22	0.69897	0	0	0	0	0.778151	0	0	0	0.30103	0	0	0	0	0	0	1.11394	0	0.30103	0	0	0	0	0
A23	0	0	0	0	0	0.30103	0	0	0	0	0	0	0	0	0	0	0	0	0.30103	0	0	0	0	0
A24	0.30103	0	0	0	0	1.11394	0	0	0	0	0	0	0	0.477121	0	0	0	0	0	0	0	0.30103	0	0
A25	0	0	0	0	0	0	0	0	0	0.69897	0	0	0	0.90309	0	0	0	0	0	0	0	0.30103	0	0
A26	0	0	0	0	0	0	0	0	0	0	0	0	0	0	0	0	0	0	0.778151	0	0.30103	0	0	0
A28	1.716	0	0	0	0	0	0	0	0	0	0	0	0	0	0	0	1.11394	0	0.477121	0	0	0	0	0
A29	0.477121	0	0	0	0	0	0	0	0	0.30103	0	0	0	0.845098	0	0	1	0	0	0	0	0	0	0
A30	0.954243	0	0	0.477121	0	0.954243	0	0	0	0.778151	0	0	0	1.63347	0	0	0.30103	0.30103	0	0	0	0.477121	0	0
A31	1.07918	0	0	0	0	0.845098	0	0	0	1.11394	0	0	0	1.20412	0	0	0.30103	0	0.778151	0	0.69897	0.69897	0	0.30103
A32	0	0	0	0	0	0	0	0	0	0.69897	0	0	0	0	0	0	0	0	1.11394	0	0	0.30103	0	0
A33	0	0	0	0	0	0.30103	0	0	0	0	0	0	0	0	0	0	0	0	1.78533	0	0	0	0	0
A35	0	0	0	0	0	2.00432	0	0	0	0	0	0	0	0	0	0	0	0	0	0	0	0	0	0
A36	0	0	0	0	0	1.34242	0	0	0	0	0	0	0	0	0	0	0	0	0	0	0	0	0	0
A37	0	0	0	0	0	2.13988	0	0	0	0	0	0	0	0	0	0	0	0	0	0	0	0	0	0
A38	0	0	0	0	0	1.44716	0	0	0	0	0	0	0	0	0	0	0	0	0	0	0	0	0	0
A39	0	0	0	0	0	0.90309	0	0	0	0	0	0	0	0	0	0	1.44716	0	0	0	0	0	0	0
A40	1.23045	0	0	0	0	1.63347	0	0	0	0.778151	0	0	0	0	0	0	0	0	0	0	0	0	0	0
B01	0	0	0	0	0.477121	0	0	0	0	0	0	0	0.477121	0	0	0	0	0	0	0	1.17609	0	0	0
B02	0	0	0	0	0	0	0	0	0	0	0	0	0.477121	0	0	0	0	0	0	0	0	0	0	0
B03	0	0	0	0	0.30103	0	0.30103	0	0	0.30103	0.60206	0	0.477121	0	0	0	0	0	1.20412	0	0	0	0	0
B05	1.04139	0	0	0	0	0	0	0	0	0.954243	0	0	0.30103	0	0	0	0	0	1.99564	0.477121	0	0	0	0
B06	0.477121	0	0	0	0	0	0	0	0.30103	0.778151	0	0	0	0	0	0	0	0	0.477121	0	0.30103	0.60206	0	0
B07	0	0	0	0	0	0	0	0	0	0.778151	0	0	0.477121	0	0	0	0	0.30103	2.14301	0	0.69897	0	0	0
B09	0.477121	1.96848	0	0	0	1.14613	0	0	0	0.778151	0	0	0	0	0	0	0	0	0	0	0.30103	0.30103	0	0
B10	1.30103	0	0	0	0	0	0	0	0	0	0	0	0	0	0	0	0	0	0.30103	0	0.30103	0	0	0
B11	0.477121	0	0	0	0	0	0	0	1.11394	0.477121	0	0	0.30103	0	0	0	0	0.30103	0	0	0	0	0	0
B12	0	0	0	0	0	0	0	0	0	0	0	0	0	0	0	0	0	0	0	0	0.30103	0	0	0
B13	0	0	0	0	0.30103	0	0	0	0	0	0	0	0	0	0	0	0	0	0.30103	0	0	0	0	0
B15	1.5563	0	0	0	0	0	0	0	0	0.477121	0	0	0	0	0	0	1.50515	0	1.6721	0	0.30103	0	0	0
B16	0.30103	0	0	0	0	0	0	0	0	0	0	0	0	0	0	0	0	0	0.60206	0	0	0	0	0
B17	0	0	0	0	0	0	0	0	0	0	0	0	0.30103	0	0	0	0	0	0	0	0	0	0	0
B18	0	0	0	0	0	0	0	0	0	0	0	0	0.477121	0	0	0	0	0	0	0	0	0	0	0
B19	0	0	0	0	0	0	0	0	0	0	0	0	0	0	0	0	0	0	1.59106	0	0	0	0	0
B21	1.61278	0	0	0	0	1.36173	0	0	0	0	0	0.428336	0.845098	0	0	0	0.60206	0	0	0	0	0	0	0.477121
B22	1.47712	0	0	0	0	0.30103	0	0	0	0	0	0.309927	1.47712	0	0	0	0	0	0	0	0.477121	0	0	0
B23	1.44716	0	0	0.60206	0	0	0	0	0	0	0	0	0.30103	0	0	0	2.16732	0	0	0	0	0	0	0
B24	0.845098	0	0	0	0.30103	0	0	0	0	0	0	0	0.477121	0	0	0	0.30103	0	1.17609	0	1.07918	0	0	0
B25	0.30103	0	0	0	0	0	0.845098	0	0	0	0	0	0	0	0	0	0	0.30103	0	0	0.60206	0	0	1
B26	0	0	0	0	0	0	0	0	0	1.07918	0.30103	0	0	0	0	0	0	0	1.6721	0	0	0	0	0
B28	1.04139	0	0	0	0	0	0	0	0	1.07918	0	0	0.30103	0	0	0	1.6721	0	0	0	0	0	0	0
B29	0	0	0	0	0	0	0	0	0	0	0	0	2.33445	0.778151	0	0	2.83696	0	0.69897	0	0.30103	0	0	0
B30	1.44716	0	0	0	0	0	0.90309	0	0	0	0	0	0.30103	0	0	0	1.60206	0	2.29226	0	0	0.30103	0	0
B31	0	0	0	0	0	0	0.69897	0	0	0	0	0.114287	0	0	0	0.30103	0	0.30103	0.69897	0	0	0	0	0.778151
B32	0.30103	0	0	0	0	0	0	0	0.30103	0	0	0	0	0	0	0	0	0	0	0	0	0	0	0.477121
B33	0	0	0	0	0	0	0	0	0	0	0	0	0	0	0	0.30103	0	0.30103	0	0	0.30103	0	0	0
B35	0	0	0	0	0	3.07078	0	0	0	0	0	0.114287	0	0	0	0	0	0	0	0	0	0	0	0
B36	0	0	0	0	0	3.48144	0	0.778151	0	0	0	0	0	0	0	0	0	0	0	0.30103	0	0	0	0
B37	0	0	0	0	0	3.14145	0	0	0	0	0	0	0	0	0	0	0	0	0	0	0	0	0	0
B38	0	0	0	0	0	2.82086	0	0.778151	0.30103	0	0	0	0	0	0	0	0	0	0	0.477121	0	0	0	0
B39	0	0	0	0	0	1.30103	0	0	0	0	0	0	0	0	0	0	0	0	0	0	0	0	0.477121	0
B40	0.30103	0	0	0	0	1.6902	0	0.30103	0	0	0	0	0.30103	0	0	0	0	0	0	0	1.43136	0	0	0
				0	0	22	0	0	0	0	0	1.68124	6
												1.04139	29
												0	1
												0	2
												0	0
												0	0
												0	1
												0	215
												0	1
												0.30103	0
												0	0
												0	0
												0.30103	0
												0	0
												0	0
												0	0
												0	0
												0	1
												0	0
												0	0
												47
												10
												0
												0
												0
												0
												0
												0
												0
												1
												0
												0
												1
												0
												0
												0
												0
												0
												0
												0
												0

## Sheet: 去稀有种99.01
	白氏银汉鱼	赤鼻棱鳀	鲷科	东方鲀属	短吻三线舌鳎	凤鲚	褐菖鲉	黄鲫	康氏小公鱼	六丝矛尾鰕虎鱼	鳗鲡科	矛尾复鰕虎鱼	矛尾鰕虎鱼	七星底灯鱼	前颌间银鱼	舌鳎属	松江鲈	鲐	鳀	鰕虎鱼科	小黄鱼	银鲳	银飘鱼	鲬
	Cdla	Tkam	SPCr	Tfug	ECDD	Emys	SmCr	StCt	CEom	EhAx	Cngu	Shas	Esti	DptA	Hpro	Eyno	TfCs	PjCp	AjCp	GoDi	Ppol	PCrg	Psin	PinB
A02	108	0	0	0	0	7	0	0	0	181	0	0	0	0	0	0	0	0	42	0	3	0	0	0
A05	0	0	3	0	0	3	0	0	0	5	0	0	0	4	0	0	0	0	1	0	4	6	0	1
A06	0	0	0	0	0	0	0	0	0	9	0	0	0	0	0	0	0	0	20	0	8	1	0	1
A07	0	0	0	0	0	0	0	0	0	122	0	0	0	0	0	0	0	0	1029	0	3	1	0	0
A09	46	0	6	0	0	0	0	0	0	1	0	0	0	0	0	0	0	0	0	0	0	2	0	0
A10	7	0	0	0	0	5	0	0	0	3	0	0	0	0	0	0	0	0	1	0	1	0	0	1
A11	3	0	0	0	0	0	0	0	0	3	0	0	0	2	0	0	0	0	0	0	0	2	0	0
A12	1	0	0	0	0	0	0	0	0	0	0	0	0	0	79	0	0	1	5	0	0	0	0	0
A13	0	0	0	0	0	129	0	0	0	0	0	0	0	0	0	0	0	1	10	0	0	2	0	0
A15	22	0	0	0	0	3	0	0	0	1	0	0	0	0	0	0	0	0	1	0	0	0	0	0
A16	2	0	0	0	0	0	0	0	0	0	0	0	0	0	0	0	0	0	0	0	0	0	0	0
A17	0	0	0	0	0	0	0	0	0	2	0	0	0	7	0	0	1	0	0	0	0	0	0	0
A18	0	0	0	0	0	0	0	0	0	0	0	0	0	0	0	0	0	0	7	0	0	0	0	0
A19	0	0	0	0	0	1	0	0	0	0	0	0	0	0	0	0	0	0	78	0	2	0	0	0
A21	0	0	0	0	0	2	0	0	0	0	0	0	0	0	0	0	0	0	0	0	0	0	0	0
A22	4	0	0	0	0	5	0	0	0	1	0	0	0	0	0	0	12	0	1	0	0	0	0	0
A23	0	0	0	0	0	1	0	0	0	0	0	0	0	0	0	0	0	0	1	0	0	0	0	0
A24	1	0	0	0	0	12	0	0	0	0	0	0	0	2	0	0	0	0	0	0	0	1	0	0
A25	0	0	0	0	0	0	0	0	0	4	0	0	0	7	0	0	0	0	0	0	0	1	0	0
A26	0	0	0	0	0	0	0	0	0	0	0	0	0	0	0	0	0	0	5	0	1	0	0	0
A28	51	0	0	0	0	0	0	0	0	0	0	0	0	0	0	0	12	0	2	0	0	0	0	0
A29	2	0	0	0	0	0	0	0	0	1	0	0	0	6	0	0	9	0	0	0	0	0	0	0
A30	8	0	0	2	0	8	0	0	0	5	0	0	0	42	0	0	1	1	0	0	0	2	0	0
A31	11	0	0	0	0	6	0	0	0	12	0	0	0	15	0	0	1	0	5	0	4	4	0	1
A32	0	0	0	0	0	0	0	0	0	4	0	0	0	0	0	0	0	0	12	0	0	1	0	0
A33	0	0	0	0	0	1	0	0	0	0	0	0	0	0	0	0	0	0	60	0	0	0	0	0
A35	0	0	0	0	0	100	0	0	0	0	0	0	0	0	0	0	0	0	0	0	0	0	0	0
A36	0	0	0	0	0	21	0	0	0	0	0	0	0	0	0	0	0	0	0	0	0	0	0	0
A37	0	0	0	0	0	137	0	0	0	0	0	0	0	0	0	0	0	0	0	0	0	0	0	0
A38	0	0	0	0	0	27	0	0	0	0	0	0	0	0	0	0	0	0	0	0	0	0	0	0
A39	0	0	0	0	0	7	0	0	0	0	0	0	0	0	0	0	27	0	0	0	0	0	0	0
A40	16	0	0	0	0	42	0	0	0	5	0	0	0	0	0	0	0	0	0	0	0	0	0	0
B01	0	0	0	0	2	0	0	0	0	0	0	0	2	0	0	0	0	0	0	0	14	0	0	0
B02	0	0	0	0	0	0	0	0	0	0	0	0	2	0	0	0	0	0	0	0	0	0	0	0
B03	0	0	0	0	1	0	1	0	0	1	3	0	2	0	0	0	0	0	15	0	0	0	0	0
B05	10	0	0	0	0	0	0	0	0	8	0	0	1	0	0	0	0	0	98	2	0	0	0	0
B06	2	0	0	0	0	0	0	0	1	5	0	0	0	0	0	0	0	0	2	0	1	3	0	0
B07	0	0	0	0	0	0	0	0	0	5	0	0	2	0	0	0	0	1	138	0	4	0	0	0
B09	2	92	0	0	0	13	0	0	0	5	0	0	0	0	0	0	0	0	0	0	1	1	0	0
B10	19	0	0	0	0	0	0	0	0	0	0	0	0	0	0	0	0	0	1	0	1	0	0	0
B11	2	0	0	0	0	0	0	0	12	2	0	0	1	0	0	0	0	1	0	0	0	0	0	0
B12	0	0	0	0	0	0	0	0	0	0	0	0	0	0	0	0	0	0	0	0	1	0	0	0
B13	0	0	0	0	1	0	0	0	0	0	0	0	0	0	0	0	0	0	1	0	0	0	0	0
B15	35	0	0	0	0	0	0	0	0	2	0	0	0	0	0	0	31	0	46	0	1	0	0	0
B16	1	0	0	0	0	0	0	0	0	0	0	0	0	0	0	0	0	0	3	0	0	0	0	0
B17	0	0	0	0	0	0	0	0	0	0	0	0	1	0	0	0	0	0	0	0	0	0	0	0
B18	0	0	0	0	0	0	0	0	0	0	0	0	2	0	0	0	0	0	0	0	0	0	0	0
B19	0	0	0	0	0	0	0	0	0	0	0	0	0	0	0	0	0	0	38	0	0	0	0	0
B21	40	0	0	0	0	22	0	0	0	0	0	1.68124	6	0	0	0	3	0	0	0	0	0	0	2
B22	29	0	0	0	0	1	0	0	0	0	0	1.04139	29	0	0	0	0	0	0	0	2	0	0	0
B23	27	0	0	3	0	0	0	0	0	0	0	0	1	0	0	0	146	0	0	0	0	0	0	0
B24	6	0	0	0	1	0	0	0	0	0	0	0	2	0	0	0	1	0	14	0	11	0	0	0
B25	1	0	0	0	0	0	6	0	0	0	0	0	0	0	0	0	0	1	0	0	3	0	0	9
B26	0	0	0	0	0	0	0	0	0	11	1	0	0	0	0	0	0	0	46	0	0	0	0	0
B28	10	0	0	0	0	0	0	0	0	11	0	0	1	0	0	0	46	0	0	0	0	0	0	0
B29	0	0	0	0	0	0	0	0	0	0	0	0	215	5	0	0	686	0	4	0	1	0	0	0
B30	27	0	0	0	0	0	7	0	0	0	0	0	1	0	0	0	39	0	195	0	0	1	0	0
B31	0	0	0	0	0	0	4	0	0	0	0	0.30103	0	0	0	1	0	1	4	0	0	0	0	5
B32	1	0	0	0	0	0	0	0	1	0	0	0	0	0	0	0	0	0	0	0	0	0	0	2
B33	0	0	0	0	0	0	0	0	0	0	0	0	0	0	0	1	0	1	0	0	1	0	0	0
B35	0	0	0	0	0	1176	0	0	0	0	0	0.30103	0	0	0	0	0	0	0	0	0	0	0	0
B36	0	0	0	0	0	3029	0	5	0	0	0	0	0	0	0	0	0	0	0	1	0	0	0	0
B37	0	0	0	0	0	1384	0	0	0	0	0	0	0	0	0	0	0	0	0	0	0	0	0	0
B38	0	0	0	0	0	661	0	5	1	0	0	0	0	0	0	0	0	0	0	2	0	0	0	0
B39	0	0	0	0	0	19	0	0	0	0	0	0	0	0	0	0	0	0	0	0	0	0	2	0
B40	1	0	0	0	0	48	0	1	0	0	0	0	1	0	0	0	0	0	0	0	26	0	0	0
A02	2.03743	0	0	0	0	0.90309	0	0	0	2.26007	0	0	0	0	0	0	0	0	1.63347	0	0.60206	0	0	0
A05	0	0	0.60206	0	0	0.60206	0	0	0	0.778151	0	0	0	0.69897	0	0	0	0	0.30103	0	0.69897	0.845098	0	0.30103
A06	0	0	0	0	0	0	0	0	0	1	0	0	0	0	0	0	0	0	1.32222	0	0.954243	0.30103	0	0.30103
A07	0	0	0	0	0	0	0	0	0	2.08991	0	0	0	0	0	0	0	0	3.01284	0	0.60206	0.30103	0	0
A09	1.6721	0	0.845098	0	0	0	0	0	0	0.30103	0	0	0	0	0	0	0	0	0	0	0	0.477121	0	0
A10	0.90309	0	0	0	0	0.778151	0	0	0	0.60206	0	0	0	0	0	0	0	0	0.30103	0	0.30103	0	0	0.30103
A11	0.60206	0	0	0	0	0	0	0	0	0.60206	0	0	0	0.477121	0	0	0	0	0	0	0	0.477121	0	0
A12	0.30103	0	0	0	0	0	0	0	0	0	0	0	0	0	1.90309	0	0	0.30103	0.778151	0	0	0	0	0
A13	0	0	0	0	0	2.11394	0	0	0	0	0	0	0	0	0	0	0	0.30103	1.04139	0	0	0.477121	0	0
A15	1.36173	0	0	0	0	0.60206	0	0	0	0.30103	0	0	0	0	0	0	0	0	0.30103	0	0	0	0	0
A16	0.477121	0	0	0	0	0	0	0	0	0	0	0	0	0	0	0	0	0	0	0	0	0	0	0
A17	0	0	0	0	0	0	0	0	0	0.477121	0	0	0	0.90309	0	0	0.30103	0	0	0	0	0	0	0
A18	0	0	0	0	0	0	0	0	0	0	0	0	0	0	0	0	0	0	0.90309	0	0	0	0	0
A19	0	0	0	0	0	0.30103	0	0	0	0	0	0	0	0	0	0	0	0	1.89763	0	0.477121	0	0	0
A21	0	0	0	0	0	0.477121	0	0	0	0	0	0	0	0	0	0	0	0	0	0	0	0	0	0
A22	0.69897	0	0	0	0	0.778151	0	0	0	0.30103	0	0	0	0	0	0	1.11394	0	0.30103	0	0	0	0	0
A23	0	0	0	0	0	0.30103	0	0	0	0	0	0	0	0	0	0	0	0	0.30103	0	0	0	0	0
A24	0.30103	0	0	0	0	1.11394	0	0	0	0	0	0	0	0.477121	0	0	0	0	0	0	0	0.30103	0	0
A25	0	0	0	0	0	0	0	0	0	0.69897	0	0	0	0.90309	0	0	0	0	0	0	0	0.30103	0	0
A26	0	0	0	0	0	0	0	0	0	0	0	0	0	0	0	0	0	0	0.778151	0	0.30103	0	0	0
A28	1.716	0	0	0	0	0	0	0	0	0	0	0	0	0	0	0	1.11394	0	0.477121	0	0	0	0	0
A29	0.477121	0	0	0	0	0	0	0	0	0.30103	0	0	0	0.845098	0	0	1	0	0	0	0	0	0	0
A30	0.954243	0	0	0.477121	0	0.954243	0	0	0	0.778151	0	0	0	1.63347	0	0	0.30103	0.30103	0	0	0	0.477121	0	0
A31	1.07918	0	0	0	0	0.845098	0	0	0	1.11394	0	0	0	1.20412	0	0	0.30103	0	0.778151	0	0.69897	0.69897	0	0.30103
A32	0	0	0	0	0	0	0	0	0	0.69897	0	0	0	0	0	0	0	0	1.11394	0	0	0.30103	0	0
A33	0	0	0	0	0	0.30103	0	0	0	0	0	0	0	0	0	0	0	0	1.78533	0	0	0	0	0
A35	0	0	0	0	0	2.00432	0	0	0	0	0	0	0	0	0	0	0	0	0	0	0	0	0	0
A36	0	0	0	0	0	1.34242	0	0	0	0	0	0	0	0	0	0	0	0	0	0	0	0	0	0
A37	0	0	0	0	0	2.13988	0	0	0	0	0	0	0	0	0	0	0	0	0	0	0	0	0	0
A38	0	0	0	0	0	1.44716	0	0	0	0	0	0	0	0	0	0	0	0	0	0	0	0	0	0
A39	0	0	0	0	0	0.90309	0	0	0	0	0	0	0	0	0	0	1.44716	0	0	0	0	0	0	0
A40	1.23045	0	0	0	0	1.63347	0	0	0	0.778151	0	0	0	0	0	0	0	0	0	0	0	0	0	0
B01	0	0	0	0	0.477121	0	0	0	0	0	0	0	0.477121	0	0	0	0	0	0	0	1.17609	0	0	0
B02	0	0	0	0	0	0	0	0	0	0	0	0	0.477121	0	0	0	0	0	0	0	0	0	0	0
B03	0	0	0	0	0.30103	0	0.30103	0	0	0.30103	0.60206	0	0.477121	0	0	0	0	0	1.20412	0	0	0	0	0
B05	1.04139	0	0	0	0	0	0	0	0	0.954243	0	0	0.30103	0	0	0	0	0	1.99564	0.477121	0	0	0	0
B06	0.477121	0	0	0	0	0	0	0	0.30103	0.778151	0	0	0	0	0	0	0	0	0.477121	0	0.30103	0.60206	0	0
B07	0	0	0	0	0	0	0	0	0	0.778151	0	0	0.477121	0	0	0	0	0.30103	2.14301	0	0.69897	0	0	0
B09	0.477121	1.96848	0	0	0	1.14613	0	0	0	0.778151	0	0	0	0	0	0	0	0	0	0	0.30103	0.30103	0	0
B10	1.30103	0	0	0	0	0	0	0	0	0	0	0	0	0	0	0	0	0	0.30103	0	0.30103	0	0	0
B11	0.477121	0	0	0	0	0	0	0	1.11394	0.477121	0	0	0.30103	0	0	0	0	0.30103	0	0	0	0	0	0
B12	0	0	0	0	0	0	0	0	0	0	0	0	0	0	0	0	0	0	0	0	0.30103	0	0	0
B13	0	0	0	0	0.30103	0	0	0	0	0	0	0	0	0	0	0	0	0	0.30103	0	0	0	0	0
B15	1.5563	0	0	0	0	0	0	0	0	0.477121	0	0	0	0	0	0	1.50515	0	1.6721	0	0.30103	0	0	0
B16	0.30103	0	0	0	0	0	0	0	0	0	0	0	0	0	0	0	0	0	0.60206	0	0	0	0	0
B17	0	0	0	0	0	0	0	0	0	0	0	0	0.30103	0	0	0	0	0	0	0	0	0	0	0
B18	0	0	0	0	0	0	0	0	0	0	0	0	0.477121	0	0	0	0	0	0	0	0	0	0	0
B19	0	0	0	0	0	0	0	0	0	0	0	0	0	0	0	0	0	0	1.59106	0	0	0	0	0
B21	1.61278	0	0	0	0	1.36173	0	0	0	0	0	0.428336	0.845098	0	0	0	0.60206	0	0	0	0	0	0	0.477121
B22	1.47712	0	0	0	0	0.30103	0	0	0	0	0	0.309927	1.47712	0	0	0	0	0	0	0	0.477121	0	0	0
B23	1.44716	0	0	0.60206	0	0	0	0	0	0	0	0	0.30103	0	0	0	2.16732	0	0	0	0	0	0	0
B24	0.845098	0	0	0	0.30103	0	0	0	0	0	0	0	0.477121	0	0	0	0.30103	0	1.17609	0	1.07918	0	0	0
B25	0.30103	0	0	0	0	0	0.845098	0	0	0	0	0	0	0	0	0	0	0.30103	0	0	0.60206	0	0	1
B26	0	0	0	0	0	0	0	0	0	1.07918	0.30103	0	0	0	0	0	0	0	1.6721	0	0	0	0	0
B28	1.04139	0	0	0	0	0	0	0	0	1.07918	0	0	0.30103	0	0	0	1.6721	0	0	0	0	0	0	0
B29	0	0	0	0	0	0	0	0	0	0	0	0	2.33445	0.778151	0	0	2.83696	0	0.69897	0	0.30103	0	0	0
B30	1.44716	0	0	0	0	0	0.90309	0	0	0	0	0	0.30103	0	0	0	1.60206	0	2.29226	0	0	0.30103	0	0
B31	0	0	0	0	0	0	0.69897	0	0	0	0	0.114287	0	0	0	0.30103	0	0.30103	0.69897	0	0	0	0	0.778151
B32	0.30103	0	0	0	0	0	0	0	0.30103	0	0	0	0	0	0	0	0	0	0	0	0	0	0	0.477121
B33	0	0	0	0	0	0	0	0	0	0	0	0	0	0	0	0.30103	0	0.30103	0	0	0.30103	0	0	0
B35	0	0	0	0	0	3.07078	0	0	0	0	0	0.114287	0	0	0	0	0	0	0	0	0	0	0	0
B36	0	0	0	0	0	3.48144	0	0.778151	0	0	0	0	0	0	0	0	0	0	0	0.30103	0	0	0	0
B37	0	0	0	0	0	3.14145	0	0	0	0	0	0	0	0	0	0	0	0	0	0	0	0	0	0
B38	0	0	0	0	0	2.82086	0	0.778151	0.30103	0	0	0	0	0	0	0	0	0	0	0.477121	0	0	0	0
B39	0	0	0	0	0	1.30103	0	0	0	0	0	0	0	0	0	0	0	0	0	0	0	0	0.477121	0
B40	0.30103	0	0	0	0	1.6902	0	0.30103	0	0	0	0	0.30103	0	0	0	0	0	0	0	1.43136	0	0	0
	28.2165	1.96848	1.44716	1.07918	1.38021	37.8559	2.74819	1.85733	2.01703	19.784	0.90309	0.966837	9.62661	7.92023	1.90309	0.60206	16.2648	2.40824	33.8522	1.25527	12.2075	6.16182	0.477121	3.93651
